1 **A human fetal lung cell atlas uncovers proximal-distal gradients of differentiation and key**  
2 **regulators of epithelial fates**

3  
4 Peng He<sup>1,2,3</sup>, Kyungtae Lim<sup>1,4</sup>, Dawei Sun<sup>1,4, 14</sup>, Jan Patrick Pett<sup>2</sup>, Quitz Jeng<sup>4</sup>, Krzysztof Polanski<sup>2</sup>,  
5 Ziqi Dong<sup>4</sup>, Liam Bolt<sup>2,12</sup>, Laura Richardson<sup>2</sup>, Lira Mamanova<sup>2,13</sup>, Monika Dabrowska<sup>2</sup>, Anna  
6 Wilbrey-Clark<sup>2</sup>, Elo Madisson<sup>2,3</sup>, Zewen Kelvin Tuong<sup>2,5</sup>, Emma Dann<sup>2</sup>, Chenqu Suo<sup>2,6</sup>, Isaac  
7 Goh<sup>7</sup>, Masahiro Yoshida<sup>8</sup>, Marko Z Nikolic<sup>8</sup>, Sam M Janes<sup>8</sup>, Xiaoling He<sup>9</sup>, Roger A Barker<sup>9</sup>, Sarah  
8 A Teichmann<sup>2,10,\*</sup>, John C. Marioni<sup>2,3,11,\*</sup>, Kerstin B Meyer<sup>2,\*</sup>, Emma L Rawlins<sup>4,15,\*</sup>

- 9  
10 1. Joint first authors  
11 2. Wellcome Sanger Institute, Hinxton, Cambridge, CB10 1SA, UK  
12 3. European Molecular Biology Laboratory, European Bioinformatics Institute (EMBL-EBI),  
13 Wellcome Genome Campus, Cambridge, UK.  
14 4. Wellcome Trust/CRUK Gurdon Institute, Department of Physiology, Development and  
15 Neuroscience, University of Cambridge, Cambridge, CB2 1QN, UK.  
16 5. Molecular Immunity Unit, University of Cambridge Department of Medicine, Cambridge,  
17 UK  
18 6. Department of Paediatrics, Cambridge University Hospitals, Hills Road, Cambridge CB2  
19 0 QQ, UK  
20 7. Biosciences Institute, Newcastle University, Newcastle upon Tyne, NE2 4HH, UK  
21 8. Lungs for Living Research Centre, UCL Respiratory, University College London, London,  
22 UK  
23 9. John van Geest Centre for Brain Repair, Department of Clinical Neurosciences and  
24 Wellcome-MRC Cambridge Stem Cell Institute, University of Cambridge, Cambridge, UK  
25 10. Department of Physics, Cavendish Laboratory, University of Cambridge, Cambridge  
26 CB3 0HE, UK  
27 11. Cancer Research UK Cambridge Institute, University of Cambridge, Cambridge, UK  
28 12. Current affiliation: Genomics England, Hinxton, CB10 1DR, UK  
29 13. Current affiliation: CS Genomics, Cambridge CB1 2JH, UK  
30 14. Current affiliation: Broad Institute of Massachusetts Institute of Technology and Harvard,  
31 Cambridge, MA 02142, USA

32 15. Lead contact

33

34 \*Corresponding authors: [sarah.teichmann@sanger.ac.uk](mailto:sarah.teichmann@sanger.ac.uk), [marioni@ebi.ac.uk](mailto:marioni@ebi.ac.uk),

35 [km16@sanger.ac.uk](mailto:km16@sanger.ac.uk), [elr21@cam.ac.uk](mailto:elr21@cam.ac.uk)

36

### 37 **Highlights**

38 ● Spatiotemporal atlas of human lung development from 5-22 post conception weeks  
39 identifies 144 cell types/states.

40 ● Tracking the developmental origins of multiple cell compartments, including new  
41 progenitor states.

42 ● Functional diversity of fibroblasts in distinct anatomical signalling niches.

43 ● Resource applied to interrogate and experimentally test the transcription factor code  
44 controlling neuroendocrine cell heterogeneity and the origins of small cell lung cancer.

45

### 46 **Abstract**

47 We present a multiomic cell atlas of human lung development that combines single cell RNA and  
48 ATAC sequencing, high throughput spatial transcriptomics and single cell imaging. Coupling  
49 single cell methods with spatial analysis has allowed a comprehensive cellular survey of the  
50 epithelial, mesenchymal, endothelial and erythrocyte/leukocyte compartments from 5-22 post  
51 conception weeks. We identify new cell states in all compartments. These include developmental-  
52 specific secretory progenitors and a new subtype of neuroendocrine cell related to human small  
53 cell lung cancer. Our datasets are available through our web interface (<https://lungcellatlas.org>).  
54 Finally, to illustrate its general utility, we use our cell atlas to generate predictions about cell-cell  
55 signalling and transcription factor hierarchies which we test using organoid models.

56

### 57 **Introduction**

58 Single cell mapping of cell states in the adult human lung in health and disease is being performed  
59 at increasing resolution (Carraro and Stripp 2022) providing a foundation for understanding lung  
60 cellular physiology. The adult lung has low rates of cell turnover (Blenkinsopp 1967; Rawlins and  
61 Hogan 2008) making it difficult to capture transition states and progenitor cells. Moreover, there  
62 are developmental-specific cell states that do not exist in the adult. A high-resolution cell atlas of



63 the embryonic and fetal human lung will identify developmental precursors and progenitors,  
64 predict differentiation trajectories and potential gene regulatory networks. This will provide a  
65 baseline for studying adult homeostasis and disease.

66  
67 The lung buds are specified in the human foregut endoderm at ~5 post conception weeks (pcw)  
68 (Burri 1984; Nikolić, Sun, and Rawlins 2018). Subsequent morphogenesis is driven by branching  
69 of the distal-most bud tips. The bud tip epithelium comprises SOX9<sup>+</sup>, ID2<sup>+</sup> multipotent progenitors  
70 which self-renew during branching (Rawlins, Clark, et al. 2009; Alanis et al. 2014; Nikolić et al.  
71 2017; Miller et al. 2018). As the bud tip epithelium branches into the surrounding mesoderm, the  
72 epithelial cells that remain in the stalk region start to differentiate into bronchiolar (airway)  
73 epithelium (~5-16 pcw) and then (from ~16 pcw) into alveolar epithelium (Nikolić, Sun, and  
74 Rawlins 2018). The pattern of growth from undifferentiated multipotent epithelial progenitors at  
75 the distal tips means that the position of a cell along the proximal-distal axis of the lung epithelial  
76 tree is a strong predictor of its maturity. The more mature cells, which exited the tip first, are found  
77 more proximally, whereas the most immature cell states, which exited the tip recently, are found  
78 in the tip-adjacent (stalk) regions (Rawlins et al. 2007). In other words, space reflects time in lung  
79 development. Therefore, coupling single cell state identification to *in vivo* spatial visualisation can  
80 provide high confidence in the identification of novel progenitor cells in the developing lung.  
81 Moreover, detailed spatial analysis of cell states allows cell identity designations to be compared  
82 to more traditional histological definitions.

83  
84 We have generated a high-resolution single cell atlas of human lung development using a  
85 combination of scRNA-seq, scATAC-seq, Visium Spatial Transcriptomics, and mRNA *in situ*  
86 hybridisation using hybridisation chain reaction (HCR) (Trivedi et al. 2018). Combining these data  
87 sources has allowed us to identify 144 cell states/types in 5-22 pcw lung samples. These include  
88 novel progenitor cell states, transition populations and a new subtype of neuroendocrine cell which  
89 is related to a subtype of human small cell lung cancer. We observe increasing cell maturation over  
90 time with many cell states identified in the adult human lungs already present at 22 pcw. Moreover,  
91 we have used our atlas to make predictions about progenitor cell states, signalling interactions and  
92 lineage-defining transcription factors, and we demonstrate how these can be efficiently tested

93 using a genetically-tractable human fetal lung organoid model. These data sets are available for  
94 interactive analysis at <https://lungcellatlas.org>.

95

## 96 **Results**

### 97 **A single cell atlas of human lung development comprising 144 cell states**

98 We obtained human embryonic and fetal lungs from 5-22 pcw for scRNA-seq and scATAC-seq.  
99 To focus on differentiation we deeply sampled 15, 18, 20 and 22 pcw lungs and separated proximal  
100 and distal regions, while leaving lungs at 5, 6, 9 and 11 pcw intact. We used a mixture of cell  
101 dissociation methods to obtain a balanced mixture of cell types (Fig. 1A) and produced high-  
102 quality transcriptome (Fig. S1A; average >2400 genes/cell) and DNA accessibility (Fig. S1O,P;  
103 average >18,000 fragments/nucleus) data. The RNA profiles of cells from different dissociation  
104 protocols and compartments were iteratively parsed out by clustering (Fig. S1C) and subclustering  
105 (Fig. S1D) without batch correction to maintain biological features. To enrich biological features  
106 and mitigate technical ones, we removed doublet-driven clusters (Fig. S1E,G,H,K), stressed or  
107 low-quality clusters (except those expressing known markers, such as erythroid) (Fig. S1I,J,N),  
108 clusters composed of cells from only one sample when replicates are available, and clusters of  
109 cells from other organs due to contamination during dissection (Fig. S1L) (He et al. 2020; Cao et  
110 al. 2020). We identified maternal cells, which are a minimal fraction in our atlas (Fig. S1M), based  
111 on genetic background (Fig. S1F). The result of this clustering is shown as a Uniform Manifold  
112 Approximation and Projection (UMAP) (Fig. 1A), on which we manually annotated fibroblast,  
113 epithelial, endothelial and erythrocyte/leukocyte lineages (Fig. 1B). Plotting the cell type  
114 distribution against time (excluding trypsin/CD326-treated samples, shown in Fig. S1B), showed  
115 that fibroblasts were the most prominent cell, particularly in younger lungs (Fig. 1C). Leukocytes  
116 and erythrocytes were observed in all lungs sampled, with B, T and NK cells becoming prominent  
117 from 15 pcw (Fig. 1C).

118

119 Further cell type annotation was performed via sub-clustering (see methods) and cluster naming  
120 was based on observed and published marker genes (Supplemental Table 1), resulting in  
121 assignment of 144 cell types/states (Fig. S2A). Sample age was a strong determinant of clustering  
122 ( $\chi^2=163727$ ,  $p \approx 0$ ), reflecting progressive cell type maturity over time (Fig. S2B). Clusters mostly  
123 grouped into three distinct regions which we categorised as early (5, 6 pcw), mid (9, 11 pcw) and

124 late (15-22 pcw) stages. Cell cycle phase (Fig. S2C,  $\chi^2=25361$ ,  $p \approx 0$ ) and dissected region (Fig.  
125 S2D,  $\chi^2=968$ ,  $p = 8.9E-131$ ) were also associated with clustering. However, region was only  
126 prominent for a small number of proximally-located cell types (Fig. S2H), suggesting that most  
127 proximal to distal regions of the airway branch structure were still represented in both dissected  
128 regions of the lung. Epithelial cells were mostly derived from the trypsin-treated and CD326-  
129 enriched samples, although airway smooth muscle, myofibroblasts and alveolar fibroblasts were  
130 also enriched here (Fig. S2E). Peripheral Nervous System (PNS) cells and chondrocytes were only  
131 obtained from 5-6 pcw lungs, likely correlating with lower extracellular matrix (ECM) complexity  
132 and/or increased fragility of older neurons. PNS cells were clustered and assigned to cell types,  
133 but their scarcity precluded further analysis (Fig. S2A,F,G). Data integration and logistic  
134 regression-based comparison showed that gene expression of our annotated cells corresponds well  
135 to those from adult lungs (Madisson et al. 2021) (Fig. S3A-C).

136

### 137 **A differentiation trajectory of airway progenitor states lies along the distal to proximal axis** 138 **of the developing lungs**

139 The epithelial cells separate by age (Fig. 2A,B), with many basal cells, MUC16<sup>+</sup> ciliated cells and  
140 secretory cells enriched in the proximally-dissected tissue (Fig. 2B; S2H). The most immature  
141 epithelial progenitors are tip cells: SOX9<sup>+</sup> multipotent progenitors located at the distal branching  
142 tips of the respiratory tree (Nikolić et al. 2017). Tip cells were separated by developmental age  
143 into early (5,6 pcw), mid (9,11 pcw) and late (15-22 pcw) populations (Fig. 2A,B) with some  
144 shared and some stage specific markers (Fig. 2C). On the epithelial UMAP, each tip population  
145 clusters closely with adjacent stalk cells (*SOX9*<sup>LO/-</sup>, *PDPN*<sup>LO</sup>, *HOPX*<sup>LO</sup>) and airway progenitors  
146 (*CYTL1*<sup>LO/+</sup>, *PCP4*<sup>+</sup>, *SCGB3A*<sup>+/LO</sup>) (Fig. 2A). The tip, stalk and airway progenitors can be  
147 visualised in a distal-proximal sequence in the tissue at all stages tested (10-16 pcw) (Fig. 2E;  
148 S4A,B, Supplemental video 1), consistent with the most proximal cells being the most mature.  
149 These three cell types form a predicted differentiation trajectory from mid-tip to mid-stalk to mid-  
150 airway progenitor which branches into the neuroendocrine, or secretory, lineages (Fig. 2D).

151

### 152 **Two subtypes of neuroendocrine cells are present in the developing airways**

153 Consistent with previous data (Cutz, Gillan, and Bryan 1985), the earliest differentiated epithelial  
154 cells detected were neuroendocrine (NE) cells in 5 pcw lungs (Fig. 2A-C). We identified two types  
155 of NE cells: classical pulmonary NE cells ( $GRP^+$ ) and  $GHRL^+$  NE cells ( $TTR^+$ ,  $GHRL^+$ ) in  
156 agreement with a recent human fetal cell atlas (Cao et al. 2020). We observed increasing maturity  
157 of NE cells over time (specific populations denoted as precursors on the UMAP). In addition, an  
158 intermediate NE population, a putative transition state, connected the two NE cell types (Fig. 2A).  
159 At 11 pcw,  $GRP^+$  NE cells were always observed closer to the budding tips, suggesting that they  
160 begin to differentiate prior to the  $GHRL^+$  NE cells (Fig. 2F). This spatial difference was not  
161 apparent in the oldest samples where both  $GRP^+$  and  $GHRL^+$  cells were observed at all airway  
162 levels, although less abundant distally (Fig. S4C). Mouse  $GHRL^+$  NE cells were not detected in  
163 re-analysis of published mouse data (Negretti, Plosa, Benjamin, Schuler, Christian Habermann, et  
164 al. 2021; Zepp et al. 2021), or spatially (Borromeo et al. 2016). However, *Ghrl* is expressed in  
165 mouse ciliated cells which cluster with human fetal  $GHRL^+$  NE cells following scVI integration  
166 (Lopez et al. 2018) and clustering analysis (Fig. S3D-F) (Zepp et al. 2021).

167

### 168 **Multiple secretory cell subtypes in the proximal cartilaginous airways**

169 We annotated 5 sub-types of differentiating secretory cells and one more immature proximal  
170 secretory progenitor. (i) The proximal secretory progenitors ( $SCGB3A2^+$ ,  $SCGB1A1^-$ ,  $SCGB3A1^-$   
171  $^{LO}$ ,  $CYTL1^+$ ) were detected in the single cell atlas at 9 pcw, prominent at 11 pcw, but rarer in older  
172 lungs consistent with a progenitor state (Fig. 2A-C,G). (ii) Club cells ( $SCGB3A2^+$ ,  $SCGB1A1^+$ ,  
173  $SCGB3A1^-$ ,  $SPDEF^+$ ,  $MUC16^-$ ) were detected from 15 pcw in the single cell data (Fig 2A-C,G), or  
174 12 pcw in the tissue localised in clusters more distally, but largely dispersed in the more proximal  
175 non-cartilaginous regions (Fig. S4D). (iii) Submucosal gland (SMG) secretory cells ( $LTF^+$ ,  
176  $SCGB3A1^+$ ,  $SPDEF^+$ ) were detected from 15 pcw in the single cell data, located in SMG ducts  
177 and likely to be a precursor of serous and/or mucous-secreting SMG cells (Fig. 2A-C,G; S4G).  
178 (iv) Proximal secretory 1 ( $SCGB1A1^{LO}$ ,  $SCGB3A2^+$ ,  $SCGB3A1^+$ ) and (v) proximal secretory 2  
179 ( $SCGB1A1^+$ ,  $SCGB3A2^+$ ,  $SCGB3A1^+$ ) appeared from 11 pcw (Fig. 2A-C,G-H; S4E). Both were  
180  $SPDEF^+$ ,  $MUC5B^+$ ,  $SERPINA1^+$  (Fig. 2I), suggesting they differentiate into goblet or mucous  
181 cells. By contrast, (vi) proximal secretory 3 ( $SCGB1A1^+$ ,  $SCGB3A2^{LO/-}$ ,  $SCGB3A1^+$ ) was detected  
182 from 15 pcw and was  $SPDEF^-$  (Fig. 2A-C), but  $CYP2F1^+$ ,  $MUC4^+$  and  $KRT4^+$  (Fig. 2G,J). All  
183 three luminal proximal secretory cell populations were located in the proximal cartilaginous

184 airways and were *MUC16*<sup>+</sup> (Fig. 2C,G,H; S4E,F). Detailed spatial-temporal analysis of 10-21 pcw  
185 airways revealed that the proportion of proximal secretory progenitors decreased with  
186 developmental age, whilst proximal secretory cells 1 and 2 increased (Fig. S5A-C); consistent with  
187 a progenitor function for proximal secretory progenitors.

188

### 189 **Other airway cells**

190 We detected ciliated cells (*FOXJ1*<sup>+</sup>, *ALOX15*<sup>+</sup>) from 11 pcw, interspersed with secretory/club cells  
191 throughout the airways (Fig. 2A-C; S4H; S5A,B). Rarer deuterosomal cells (*FOXJ1*<sup>+</sup>, *CDC20B*<sup>+</sup>)  
192 appeared at the same time (Fig. 2A-C). *MUC16*<sup>+</sup> ciliated cells (*FOXJ1*<sup>+</sup>, *DNAH*<sup>+</sup>, *MUC16*<sup>L<sup>0</sup></sup>) were  
193 also detected from 11 pcw, but confined to proximal dissected regions (Fig. 2A-C; S2H). They  
194 were located in patches in the most proximal cartilaginous airways (Fig. S4I), and likely represent  
195 *MUC16*<sup>+</sup> secretory cells generating ciliated cells, as suggested in the adult (Deprez et al. 2020;  
196 Carraro et al. 2021; Vieira Braga et al. 2019). Basal cells (*TP63*<sup>+</sup>, *F3*<sup>+</sup>) were present from 9 pcw  
197 (Fig. 2A-C; S4J) and more frequent in proximal regions (Fig. 2C; S2H; S5A,B). Rarer cells  
198 (ionocytes, tuft) that have been consistently identified in adult airways were not present in our  
199 single cell data. However, we found putative ionocytes (*FOXJ1*<sup>+</sup>; 4/4 lungs) and putative tuft cells  
200 (*POU2F3*<sup>+</sup>; 2/4 lungs) in the most proximal cartilaginous airways of 21-22 pcw lung sections (Fig.  
201 S5E), suggesting they begin to differentiate mid-gestation. Moreover, we reproducibly detected a  
202 small population of *MUC5AC*<sup>+</sup>, *ASCL1*<sup>+</sup> cells in 9,11 pcw lungs (Fig. 2A-C). These were localised  
203 to the proximal non-cartilaginous airways where they appeared as solitary, somewhat basal, non-  
204 columnar cells (Fig. S4K). We hypothesise that they are an unknown progenitor, consistent with  
205 their transient appearance and the observation that *Ascl1*<sup>+</sup> NE cells in adult mice can generate club,  
206 ciliated and mucous cells following injury (Yao et al. 2018; Ouadah et al. 2019).

207

### 208 **Predicted airway epithelial differentiation trajectories**

209 A detailed spatio-temporal analysis of the major airway epithelial cell types from 10-21 pcw  
210 confirms that cell maturation begins in the more proximal regions. An example is lack of ciliated  
211 and club cells in the distal non-cartilaginous airways at 10-12 pcw, but presence at 15-21 pcw (Fig.  
212 S5A-D). Conversely, airway progenitors are found throughout the non-cartilaginous airways at  
213 10-12 pcw, but restricted to the terminal airways by 15-21 pcw (Fig. S5A-D). In addition, proximal

214 secretory cells are spatially restricted to the cartilaginous airways, whilst club cells are found in  
215 the non-cartilaginous regions (Fig. S5A-D).

216

217 This spatial separation means that predicted differentiation trajectories which combine proximal  
218 secretory cells and club cells (Fig. 2D) can reveal general trends, but are likely to be over-  
219 simplified. We therefore predicted mid- (Fig. S6A-C) and late-stage (Fig. S6D-F) airway lineage  
220 trajectories separately. In both cases, basal cells formed discrete clusters on the UMAPs (Fig.  
221 S6A',D'). Trajectory inference analysis suggests a differentiation route from mid-tip to stalk to  
222 airway progenitors to proximal secretory progenitors and proximal secretory cells (Fig. S6B),  
223 consistent with sample age (Fig. S6B'). Visualising gene expression along the inferred trajectory  
224 shows mid-tip and stalk cells are similar (Fig. S6C). The stalk cells lose some tip markers,  
225 including *FOXP2* and *SOX9*, and gain a relatively small number of genes including *PDPN* and  
226 *AGER*. By contrast, the newly-defined airway progenitors upregulate marker genes associated with  
227 airway fates, including *CYTL1*, *CLDN4* and *SCGB3A2* (Kaarteenaho et al. 2010; Guha et al. 2012)  
228 (Fig. S6C). A similar differentiation trajectory was predicted from late-tip to late-stalk to late-  
229 airway progenitor to club cells (Fig. S6E), although the oldest tip and stalk cells included in this  
230 analysis may produce alveolar lineages (Fig. S6E'; 3C-E; S7A,B). Visualising gene expression  
231 along the inferred late-airway trajectory shows that the late-tip and stalk cells are transcriptionally  
232 similar and undergo gene expression changes analogous to mid-tip and stalk (loss of *SOX9*,  
233 *FOXP2*; gain of *PDPN*, *AQP5*; Fig. S6F).

234

235 These analyses predict that cells first exit the tip into a tip-adjacent stalk-state, followed by gain  
236 of airway progenitor identity before commitment to a specific differentiation state that likely  
237 depends on local signalling cues. Although we cannot predict the origin of the basal cells using  
238 trajectory inference methods, we hypothesise that they are derived from a columnar progenitor  
239 (possibly the airway progenitor), but will themselves act as progenitor/stem cells following  
240 differentiation analogous to previous observations in mice (Yang et al. 2018).

241

242 Our trajectory inference (Fig. S6A-F) predicts that airway progenitors will differentiate readily to  
243 airway cell types. At 9-10 pcw, *CYTL1*<sup>+</sup>, *SCGB3A2*<sup>+</sup> airway progenitors are found throughout the  
244 airway tree (Fig. 2E; S4B,D,L; S5A,B,D). We devised a strategy to isolate airway progenitors



245 using a combination of distal non-cartilaginous airway micro-dissection and transduction with a  
246 lentiviral *SCGB3A2* transcriptional reporter (*SCGB3A2-GFP*, Fig. S6G). Freshly-isolated distal  
247 *SCGB3A2-GFP*<sup>+</sup> cells were *SOX9*<sup>LO</sup>, *CYTL1*<sup>HI</sup>, *SCGB1A1*<sup>LO</sup>, *SCGB3A2*<sup>LO</sup>, and *SCGB3A1*<sup>LO</sup>  
248 compared to tip/stalk cells and more proximal *SCGB3A2-GFP*<sup>+</sup> cells from the same lungs (Fig.  
249 S6H), confirming airway progenitor identity. When single cells were placed into an FGF-  
250 containing differentiation medium (Hawkins et al. 2021), distal *SCGB3A2-GFP*<sup>+</sup> cells produced  
251 basal, ciliated and mature secretory cells (Fig. S6I-K). This demonstrates that, consistent with the  
252 trajectory analysis, the airway progenitors are competent to differentiate into airway lineages.

253

254 In summary, we have identified multiple epithelial progenitor states (tip; stalk; airway progenitor;  
255 proximal secretory progenitor) and differentiating airway cells which localise to a spatial  
256 differentiation gradient along the proximal-distal axis of the epithelium (summarised in Fig. S4L;  
257 S5D). Moreover, we identify *GHRL*<sup>+</sup> neuroendocrine cells which do not exist in the mouse.

258

### 259 **Late epithelial tip cells acquire alveolar identity prior to alveolar epithelial differentiation**

260 The tip cells expressed a core set of tip-specific markers (*SOX9*<sup>+</sup>, *ETV5*<sup>+</sup>, *TESC*<sup>+</sup>, *TPPP3*<sup>+</sup>, *STC1*<sup>+</sup>)  
261 at all stages sampled (Fig. 2A-C). We observed a gradual decrease in tip marker expression and  
262 an increase in alveolar type 2 (AT2) cell gene expression in tip cells with developmental age (Fig.  
263 2C). Indeed, by 15 pcw the AT2 markers *SFTPC* and *SFTPA* were detected readily in the late-tip  
264 cells where they were co-expressed with lower levels of core tip markers (Fig. 3A,B). This late-  
265 tip is a unique tip cell transcriptional state which has not been detected in developing mouse lungs  
266 (Negretti, Plosa, Benjamin, Schuler, Habermann, et al. 2021; Zepp et al. 2021). The change in tip  
267 gene expression correlates with predicted differentiation trajectories from early to mid to late-tip  
268 cells to (late-stalk to) fetal AT2 and AT1 cell fates (Fig. 3C,D; without late-stalk in S7A).  
269 However, trajectory inference analysis at this transitional developmental stage is challenging. It is  
270 likely that some of the late-tip cells are producing the terminal branches of the conducting airways  
271 (Fig. S6D-F). Moreover, the inferred connections between mid-tip and late-tip cells are weak (Fig.  
272 3C) and we cannot exclude a novel origin for late-tip cells perhaps emerging as new buds from a  
273 stalk position, although this hypothesis is not strongly supported by our analysis (Fig. 2D).  
274 Nevertheless throughout this period, similar to earlier stages, the late-tip cells remain *SOX9*<sup>+</sup> and  
275 the late-stalk cells turn off tip markers and acquire *PDPN/AGER* (Fig. S4A; S7D).

276

277 A small number of AT2 cells appear in the single cell data from 15 pcw, but are more prominent  
278 from 22 pcw (Fig. 2A). Similarly, at 16 pcw late tip cells ( $SOX9^+$ ,  $TPPP3^+$ ,  $SFTPC^+$ ) were clearly  
279 visualised in the tissue, but differentiating AT2 cells ( $SOX9^{LO/-}$ ,  $TPPP3^{LO/-}$ ,  $SFTPC^+$ ) were rare  
280 suggesting AT2 production is just beginning (Fig. 3F,G; S7C). Over the following weeks, the size  
281 of the tip regions decreased and more differentiating AT2 cells ( $SOX9^{LO/-}$ ,  $TPPP3^{LO/-}$ ,  $SFTPC^+$ )  
282 were detected (Fig. 3F,G). At 21 pcw smaller numbers of late tip cells persist and AT2 cells ( $SOX9^-$   
283 ,  $SFTPC^+$ ,  $NASPA^+$ ,  $ETV5^+$ ) were found scattered throughout the developing air sacs (Fig. 3H,  
284 S7E-J). Consistent with the predicted change in tip fate potential (Fig. 3C-E), late-tip cells (16-20  
285 pcw) grown as organoids retained a late-tip phenotype *in vitro* and were much more readily  
286 differentiated to mature AT2s than organoids derived from earlier developmental stages (Lim et  
287 al. 2021).

288

289 In our single cell atlas, differentiating AT1 cells were first visible at 18 pcw, but more prominent  
290 by 22 pcw (Fig. 2A-C). Similarly in tissue sections, AT1 cells were not detected at 17 pcw (Fig.  
291 S7H). However, by 20 pcw differentiating AT1 cells ( $SPOCK2^{LO}$ ,  $SFTPC^-$ ) were visible and at 21  
292 pcw AT1 cells ( $SPOCK2^+$ ,  $SFTPC^-$ ) were interspersed with AT2 cells lining the developing air  
293 sacs (Fig. 3I; S7I,J). In sections, AT1 markers were only detected in cells which had undetectable,  
294 or extremely low levels of,  $SFTPC$  (Fig. S7H-J). Moreover,  $SFTPC$ -negative cells were always  
295 observed in the stalk regions from 16 pcw onwards (Fig. 3F). These spatial expression data are  
296 consistent with an alveolar epithelial differentiation model in which from ~16 pcw the late-tip  
297 progenitors first exit the tip state, turning off co-expressed AT2 cell markers, and enter the late-  
298 stalk cell state, prior to initiating AT1 or AT2 cell differentiation in response to local signalling  
299 cues (Fig. 3J). Furthermore, the late-stalk cells are connected to AT2, AT1 and late airway  
300 progenitors in trajectory inference analysis (Fig. 2D; 3C,D), supporting our hypothesis that at all  
301 stages of lung development, cells exit the tip and enter a stalk-state prior to differentiation. This  
302 model for spatial patterning of human alveolar development is different from the current prevailing  
303 mouse model in which AT2 and AT1 cells are thought to be specified early in development (Zepp  
304 et al. 2021; Frank et al. 2019).

305



306 Integration of our fetal atlas with adult data revealed high correlation between expected groups:  
307 fetal airway progenitors with adult secretory club cells; fetal and adult ciliated and deuterosomal  
308 cells; proximal secretory fetal cells with adult goblet cells (Fig. S3A). The AT2 and AT1 cells we  
309 detect in the fetal lungs cluster closely with the adult (Fig. S3A; Pearson correlation coefficients:  
310 fetal-adult AT2 0.66; AT1 0.80). However, the fetal cells are immature and differ in gene  
311 expression to their adult counterparts (for example, for AT2/1, Fig. S3G).

312

### 313 **Lung endothelial cells exhibit early specialisation into arterial and venous identities**

314 At 5-6 pcw, the endothelial cells (ECs) comprised capillary (early Cap: *THY1*<sup>+</sup>, *CD24*<sup>+</sup>), *GRIA2*<sup>+</sup>  
315 arterial (*GRIA2*<sup>+</sup>, *GJA5*<sup>+</sup>) and lymphatic ECs (*PROX1*<sup>+</sup>, *STAB1*<sup>+</sup>, *UCP2*<sup>LO</sup>) (Fig. S8A-C); showing  
316 that capillaries and lymphatic vessels are distinct from the earliest stages of lung development and  
317 that arterial specification begins prior to venous. With increasing age, the capillary EC lineage  
318 moves from early (*THY1*<sup>+</sup>, *CD24*<sup>+</sup>, *EGLN1*<sup>+</sup>) to mid (*CA4*<sup>+</sup>, *KIT*<sup>+</sup>, *EGLN1*<sup>+</sup>) to late (*CA4*<sup>+</sup>, *KIT*<sup>+</sup>)  
319 sub-types (Fig. S8A-C), similar to the age transitions in other compartments. Trajectory analysis  
320 predicts that both mid- and late-Cap cells generate arterial and venous ECs (Fig. S8G,H).  
321 Aerocytes (*CA4*<sup>LO</sup>, *SI00A3*<sup>+</sup>), capillary ECs specialised for gas exchange and leukocyte trafficking  
322 (Gillich et al. 2020; Vila Ellis et al. 2020), were observed at 20-22 pcw (Fig. S8A-C) arranged  
323 around the developing air sacs (Fig. S8D). Microvasculature specification therefore occurs  
324 relatively late in human fetal life coincident with the development of AT1 cells.

325

326 Broad markers of arterial and venous specification were clear in sections at 20 pcw (Fig. S8E).  
327 Three distinct arterial ECs were detected. *GRIA2*<sup>+</sup> and arterial ECs (*DKK2*<sup>+</sup>, *SSUH2*<sup>+</sup>) form a  
328 continuous differentiation trajectory in pseudotime (Fig. S8G,H) with *GRIA2*<sup>+</sup> ECs likely to be a  
329 more immature form. The *OMD*<sup>+</sup> ECs (*GJA5*<sup>+</sup>, *DKK2*<sup>+</sup>, *PTGIS*<sup>+</sup>, *OMD*<sup>+</sup>) cluster with arterial ECs,  
330 are more proximal (Fig. S2H) and line the larger arterial vessels (Fig. S11B). By contrast, venous  
331 ECs (*PVLAP*<sup>+</sup>, *ACKR3*<sup>+</sup>, *HDAC9*<sup>+</sup>) do not have clear subclusters (Fig. S8A-C). Systemic and  
332 pulmonary circulation ECs have been found in adult lungs (Schupp et al. 2021); we cannot detect  
333 these in fetal lungs.

334

335 Two major lymphatic ECs were detected, lymphatic ECs (*PROX1*<sup>+</sup>, *STAB1*<sup>+</sup>, *UCP2*<sup>LO</sup>) and SCG3<sup>+</sup>  
336 lymphatic ECs (*PROX1*<sup>+</sup>, *SCG3*<sup>+</sup>), with an intermediate population connecting them (Fig. S8A-  
337 C,F). SCG3<sup>+</sup> lymphatic ECs resemble a lymphatic valve population (Takeda et al. 2019).

338

### 339 **Haematopoietic cell types in the developing lung**

340 At the early stages (5-6 pcw) when arterial, capillary and lymphatic ECs were present, embryonic  
341 erythrocyte, HMOX1<sup>+</sup> erythroblast and a small number of macrophages and ILC progenitors were  
342 detected, representing the early progenitors of haematopoiesis. After 11 pcw relative numbers of  
343 lymphoid and myeloid cells increased, dominated by macrophages, ILCs, dendritic, NK, T and B  
344 cells (Fig. 1C, S2A,B, S9A-C,F,G,K). Immature T cells are largely absent from the atlas, consistent  
345 with the restriction of T cell development to the thymus. In contrast, a range of early B cell  
346 precursors and the ILC precursor were detected. We enriched TCR and BCR fragments from our  
347 scRNA-seq libraries which supported cell-type identities and subdivision (Fig. S9D-E,H-J). To  
348 look for lung-specific features of the leukocyte cells, we compared our atlas with a pan-fetal human  
349 atlas (Cao et al. 2020). Unlike epithelial, endothelial and fibroblasts, leukocytes in our atlas are  
350 transcriptionally highly similar to those of other organs with minimal evidence of lung-specificity  
351 (Fig. S9L).

352

### 353 **Developmental trajectories of mesenchymal cells**

354 The broad fibroblast cluster comprises fibroblasts, myofibroblasts, airway and vascular smooth  
355 muscle (ASM and vSMC), pericytes, mesothelium and chondrocytes (Fig. 4A,B). Airway  
356 fibroblasts and chondrocytes were proximally-enriched; mesothelium distally-enriched (Fig. S2H;  
357 4D). There is a distinct separation of cell clusters by age (Fig. 4C). Airway SM cells were observed  
358 from 9 pcw, consistent with previous immunostaining (Nikolić et al. 2017), and showed increasing  
359 maturity over time (Fig. 4A-C). Two distinct populations of vSMC were observed throughout the  
360 time course: vSMC1 (*NTRK3*<sup>+</sup>, *NTN4*<sup>+</sup>, *PLN*<sup>+</sup>) and vSMC2 (*NTRK3*<sup>+</sup>, *NTN4*<sup>+</sup>, *PLN*<sup>+</sup>) (Fig. 4A,B)  
361 and were intermingled around the same vessels on tissue sections (Fig. S10A,C). vSMC1 was  
362 enriched in genes relating to ECM organisation and cell adhesion, whereas vSMC2 was enriched  
363 for transcripts encoding contractility proteins and signalling molecules (Fig. S10B). Intermingling  
364 of vSMC subtypes with different levels of contractility proteins is seen in adult lungs (Frid et al.  
365 1997); our developmental observation suggests that these represent normal functional/ontological

366 differences, rather than pathology. Pericytes (*FAMI62B*<sup>+</sup>) were visualised adjacent to the  
367 microvascular endothelium (Fig. S10D).

368

369 The most common cells isolated from 5-15 pcw lungs were fibroblasts (Fig. 1C). At 5-6 pcw,  
370 early-fibroblasts (*SFRP2*<sup>+</sup>, *WNT2*<sup>+</sup>) predominated, although multiple populations were detected  
371 (Fig. 4A,B). In 9,11 pcw lungs, early-fibroblasts had matured into mid-fibroblasts (*WNT2*<sup>+</sup>,  
372 *FGFR4*<sup>LO</sup>) which have recently been shown to promote epithelial tip cell fate (Hein et al. 2022).  
373 In the most mature lungs sequenced, there were three distinct fibroblast populations: adventitial  
374 (*SFRP2*<sup>+</sup>, *PII6*<sup>+</sup>), airway (*AGTR2*<sup>+</sup>, *SI00A4*<sup>+</sup>) and alveolar (*WNT2*<sup>+</sup>, *FGFR4*<sup>+</sup>) with distinct spatial  
375 locations (Fig. 4A,B,D-H). In addition, an intermediate fibroblast population connected the more  
376 mature fibroblasts on the UMAP (Fig. 4A,B), possibly representing a transitional state. Pseudotime  
377 analysis predicted a differentiation hierarchy from the early and mid fibroblasts to adventitial  
378 fibroblasts; with alveolar and airway fibroblasts forming separate branches (Fig. 4I-K).  
379 Alternatively, the intermediate fibroblast population may indicate plasticity in the fibroblast  
380 lineage in normal development as previously suggested (Kumar et al. 2014).

381

382 The three major fibroblast types in 15-22 pcw lungs expressed high levels of genes associated with  
383 ECM organisation, but had distinct gene expression patterns and spatial localisation. Adventitial  
384 fibroblasts (*SFRP2*<sup>+</sup>, *PII6*<sup>+</sup>) surrounded the larger blood vessels (Fig 4D). They formed diffusely  
385 arranged layers of cells surrounding the tightly packed concentric rings of ECs, pericytes and  
386 smooth muscle (Fig 4E, S10C). Adventitial fibroblasts were enriched in gene expression  
387 associated with ECM organisation and signalling, including BMP, TGFβ, WNT (Fig. 4J,K;  
388 S10E,F) consistent with described roles providing structural support to the perivascular region  
389 (Dahlgren and Molofsky 2019). Alveolar fibroblasts (*WNT2*<sup>+</sup>, *FGFR4*<sup>+</sup>) were observed throughout  
390 the lung, particularly surrounding the tip cells and close to the microvasculature (Fig 4F). They  
391 were enriched in genes associated with actin organisation, focal adhesions and morphogenesis, as  
392 well as signalling molecules (Fig. 4J,K; S10E,F). Adventitial and alveolar fibroblasts shared key  
393 markers such as collagens, but also expressed unique genes (adventitial: *SERPINF1*, *SFRP2*, *PII6*;  
394 alveolar: *FGFR4*, *VEGFD*; Fig. 4K). By contrast, the airway fibroblasts (*AGTR2*<sup>+</sup>, *SI00A4*<sup>+</sup>, note  
395 that *SI00A4* is expressed in various immune and airway epithelial cells) were adjacent to the  
396 airway smooth muscle and highly enriched in signalling molecules associated with morphogenesis

397 (Fig. 4D,G,J,K; S10E,F). We did not detect lipofibroblasts (Travaglini et al. 2020), meaning that  
398 they are either exceptionally rare, or form later than 22 pcw, or do not form distinct clusters in all  
399 lung data sets (Madisson et al. 2021). Endothelial and fibroblast populations align well between  
400 fetal and adult data (Fig. S3B,C), but with some unique developmental states, such as fetal  
401 early/mid-fibroblasts and myofibroblasts.

402

403 Myofibroblasts formed three distinct groups in our single cell data. Myofibroblast 1 (*CXCL14*<sup>+</sup>,  
404 *KCNK17*<sup>+</sup>, *CT45A3*<sup>+</sup>, *THBD*<sup>LO</sup>) appeared at 9 pcw and persisted to 20 pcw. Myofibroblast 2  
405 (*CXCL14*<sup>+</sup>, *KCNK17*<sup>+</sup>, *CT45A3*<sup>+</sup>, *THBD*<sup>HI</sup>) and myofibroblast 3 (*CXCL14*<sup>+</sup>, *KCNK17*<sup>+</sup>, *CT45A3*<sup>-</sup>,  
406 *THBD*<sup>-</sup>) were predominantly identified at 22 pcw (Fig. 4A,B). Throughout development,  
407 myofibroblasts (*CXCL14*<sup>+</sup>, *KCNK17*<sup>+</sup>) were visualised surrounding the developing stalk region of  
408 the epithelium, suggesting a close signalling relationship (Fig. 4D,H, S10G,H). Although not  
409 detected in significant numbers in the scRNA-seq data until 22 pcw, we see myofibroblast 2  
410 (*PDGFRA*<sup>+</sup>, *THBD*<sup>HI</sup>, *NOTUM*<sup>+</sup>) around the stalk epithelium from 15 pcw (Fig. 4D; S10H,J,K),  
411 the same position as myofibroblast 1. The appearance of myofibroblast 2 is coincident with the  
412 acquisition of AT2 markers by the late tip cells, and it may be a more mature state of myofibroblast  
413 1. Myofibroblast 2 was enriched in gene expression associated with cell contractility and focal  
414 adhesions, as well as WNT signalling (Fig. S10J,K). Co-expression of the Wnt-responsive genes  
415 *LEF1*, *NOTUM* and *NKDI* suggests that myofibroblast 2 is responding to local Wnt expression  
416 (*WNT2* is high in alveolar fibroblasts) and producing the secreted Wnt inhibitor NOTUM;  
417 potentially to regulate local cell patterning. We tested this hypothesis using co-culture experiments  
418 where myofibroblast 2 was shown to both respond to WNT and to modulate the Wnt-response of  
419 co-cultured epithelial cells (Lim et al. 2021). *In vivo*, it is likely that myofibroblast 2 modulates  
420 the WNT2 signal from the alveolar fibroblasts mediating spatial patterning of epithelial AT2 and  
421 AT1 fate in human lung development. By contrast, myofibroblast 3 has higher expression of genes  
422 associated with ECM organisation and a variety of signalling molecules, including *C7*, *RSPO2* and  
423 *BMPER* (Fig. S10J). Myofibroblast 3 was always localised to the developing air sacs (Fig. S10I),  
424 rather than the stalk epithelium, and are likely to be precursors of the alveolar myofibroblasts (Li  
425 et al. 2020; Zepp et al. 2021).

426

427 **Signalling niches in lung development**

428 We used CellPhoneDB (Efremova et al. 2020) to analyse cell-cell communication with the aim of  
429 predicting signalling interactions controlling cell fate allocation. We focused on 15-22 pcw cells  
430 and, based on the spatial localisation of the major fibroblast populations (Fig. 4E-G), analysed  
431 signalling within three niches, defined as - Airway niche: airway fibroblasts; late airway SMCs;  
432 airway epithelial cells. Alveolar niche: alveolar fibroblasts, aerocytes, late Cap cells, late tip cells,  
433 AT1, AT2. Adventitial niche: adventitial fibroblasts, arterial endothelium, OMD<sup>+</sup> endothelium,  
434 vascular smooth muscle cells. CellPhoneDB predicts numerous signalling interactions  
435 (Supplemental Table 2) which we curated by plotting the expression of ligand-receptor pairs  
436 representing major signalling pathways (Fig. 5A,B; S11A). We observed expected interactions,  
437 including high levels of Notch ligands and receptors and CXCL12-CXCR4 signalling in the  
438 adventitial niche (Fig. S11A,B) (Herbert and Stainier 2011). Similarly, expected signalling  
439 predicted in the alveolar niche included aerocytes to late cap cells (ALPN-ALPNR) and alveolar  
440 epithelial cells to microvascular ECs (VEGFA-FLT1/FLT4/KDR) (Fig. 5B; S11B) (Gillich et al.  
441 2020; Vila Ellis et al. 2020).

442  
443 Airway fibroblasts were predicted to signal via TGF $\beta$ 3 and BMP4 to the airway epithelium,  
444 consistent with roles for these signals in human basal cell specification and differentiation (Miller  
445 et al. 2020; Mou et al. 2016). Airway fibroblasts and ASM were also predicted to signal to the  
446 epithelium via FGF7/18 to FGFR2/3 and non-canonical WNT5A to FZD/ROR (Fig. 5A). By  
447 contrast, although FGF and WNT signalling interactions were predicted in the alveolar niche,  
448 interactions were based on lower levels of *FGF*, but higher levels of canonical *WNT2* and its  
449 receptor (Fig. 5B). The predicted FGF and WNT signalling interactions in the alveolar niche/late  
450 tip cells are consistent with the requirement of these factors for long-term self-renewal of human  
451 distal tip organoids (Nikolić et al. 2017; Lim et al. 2021). Tissue staining showed that although  
452 *FGF7* is expressed fairly ubiquitously, the airway fibroblasts and ASM form a distinct barrier  
453 between the airway epithelium and the *WNT2* expression (Fig. 5C-E). Based on these data, we  
454 predicted that removing canonical WNT, but retaining FGF signalling would promote airway  
455 differentiation in the human distal tip organoids (Fig. 5F). Indeed, we observed robust basal,  
456 secretory and ciliated cell differentiation in response to FGF-containing medium (Fig. 5G,H).

457

458 **scATAC-seq analysis identifies putative cell fate regulators**

459 Single cell ATAC-seq provides an independent method of assessing cell type based on open  
460 chromatin regions and allows cell type-specific TFs to be predicted. After tissue dissociation, the  
461 single cell suspensions were split and half of the cells processed for nuclear isolation and scATAC-  
462 seq (Fig. 1A). Following quality control and doublet removal, 67 scATAC-seq clusters comprising  
463 ~100K cells were obtained and a label transfer process was used to annotate scATAC-seq clusters  
464 based on our scRNA-seq data (Fig. 6A). Not every cell state detected by scRNA-seq was  
465 distinguishable by scATAC-seq, consistent with previous work (Domcke et al. 2020; Cao et al.  
466 2020). For example, separate early-tip, stalk and airway progenitor clusters were discerned by  
467 scRNA-seq (Fig. 2A), but a combined cluster with strong similarity to all three cell types was  
468 detected by scATAC-seq (Fig. 6A). Similarly, the resolution of scATAC-seq allowed us to identify  
469 a combined AT1/AT2 cluster and single arterial endothelial, vascular smooth muscle,  
470 myofibroblast and basal cell clusters (Fig. 6A). Nevertheless, there was broad agreement between  
471 the scRNA-seq and ATAC-seq data in terms of capturing cell types, including many of the  
472 novel/lesser-known cell types we identified by scRNA-seq (mid and late tip, mid and late airway  
473 progenitors, GHRL<sup>+</sup> NE, MUC16<sup>+</sup> ciliated, dueterosomal, airway fibroblasts, aerocytes, SCG3<sup>+</sup>  
474 lymphatic endothelial cells).

475  
476 We analysed TF binding motifs in the unique/enriched open chromatin regions in each cluster and  
477 plotted the top 5 TF motifs per cell type (Fig. S12). As expected, TFs belonging to the same family  
478 are frequently enriched in the same cell type due to similarities in their binding motifs. This  
479 analysis revealed some expected TF signatures, for example TCF21 in the alveolar, adventitial and  
480 airway fibroblasts (Quaggin et al. 1999), GRHL and FOXA1/2 in epithelium (Gao et al. 2013;  
481 Wan et al. 2005), and SOX17 in arterial endothelium (Corada et al. 2013). Examining epithelial  
482 cells and focussing on TFs expressed in the corresponding cell type in the scRNA-seq data (Fig.  
483 6B,C, marked by asterisk in B), TEAD motifs were enriched in mid-stalk cells consistent with a  
484 key role for Yap (van Soldt et al. 2019), NKX2.1 in AT1/AT2 cells (Kimura, Ostrin, and Chen  
485 2019), KLF factors in secretory and AT1/AT2 (Liberti et al. 2022) and TP63 in basal cells (Rock  
486 et al. 2009). Unexpected TF signatures included HNF1B in late tip cells, and ZBTB7A in early  
487 tip/stalk/airway progenitors. We focused on the pulmonary and GHRL<sup>+</sup> NE cells which cluster  
488 closely in both data sets (Fig. 2A, 6A). ASCL1 is required for mouse NE cell differentiation (Ito  
489 et al. 2000; Borges et al. 1997) and this motif is strongly associated with both pulmonary and



490 GHRL<sup>+</sup> NE cells (Fig. 6B). However, both cell types also have specific TF motifs including  
491 NEUROD1 and RFX6 in the GHRL<sup>+</sup> NEs, and TCF4 and ID in the pulmonary NEs (Fig. 6B).  
492 Consistent with this, there are distinct, unique regions of open chromatin, especially in the  
493 neighbourhood of cell-type specific genes such as GRP and GHRL (Fig. 6D).

494

495 We have produced a high-resolution scATAC-seq data set for the developing human lungs which  
496 is highly consistent with our scRNA-seq data. Mining this data provides hypotheses for lineage-  
497 determining TFs in lung development. As further scATAC datasets become available for control  
498 and diseased adult lungs, our data will provide a resource for comparing normal and aberrant TFs  
499 and chromatin regulation.

500

### 501 **Transcriptional control of neuroendocrine cell subtype formation**

502 Pulmonary NE and GHRL<sup>+</sup> NE cells share the expression of many TFs and open chromatin  
503 regions, but are transcriptionally distinct. In our scRNA-seq data, they were both observed along  
504 a maturation trajectory (from what are labelled as precursors), shared classical NE markers  
505 (*CHGA*, *SYP*), but differed in TF and hormone expression (Fig. 7A,B). A third NE population  
506 (intermediate NE) clustered between pulmonary and GHRL<sup>+</sup> NE cells with intermediate gene  
507 expression (Fig. 7A,B), although it did contain a small number of cells expressing the unique  
508 marker *NEUROG3*. Pseudotime trajectory analysis suggested that pulmonary NE and GHRL<sup>+</sup> NE  
509 cells were derived from airway progenitors/stalk cells and that intermediate NEs are an additional  
510 transition population (Fig. S13A,B). Transition states between pulmonary NE and GHRL<sup>+</sup> NE  
511 were observed in sections (Fig. S13C). We therefore postulated that Pulmonary NE precursors  
512 could acquire *NEUROG3* and convert to GHRL<sup>+</sup> NE fate (Fig. 7C), or vice-versa - GHRL<sup>+</sup>  
513 precursors converting to pulmonary NE fate. In sections, *ASCL1* was co-expressed with *GRP*, but  
514 rarely with *GHRL*. We also observed *ASCL1* single-positive cells, likely representing pulmonary  
515 NE precursors (Fig. 7D). *NEUROD1* was co-expressed with *GHRL*, but also observed with *GRP*  
516 (Fig. 7E). Whereas *NEUROG3* was co-expressed with *ASCL1* and/or *NEUROD1*, supporting a  
517 role in a transition population (Fig. S13D).

518

519 Differential expression of *ASCL1* and *NEUROD1* defines A- and N-type human small cell lung  
520 cancer (SCLC), which likely derive from NE cells (Gay et al. 2021). Interestingly, these two TFs

521 coincide with the scRNA-seq marker genes and scATAC-seq TF motif enrichment of our fetal NE  
522 cells (Fig. 6B,7B). We generated SCLC feature gene lists (Borromeo et al. 2016) and performed  
523 gene signature scoring, showing that the A-type signature resembles pulmonary NEs, whereas the  
524 N-type resembles GHRL<sup>+</sup> NEs (Fig. 7F). These data suggest that either there are two different NE  
525 cells of origin for human SCLCs, or that SCLCs reuse developmental mechanisms as suggested  
526 by some mouse models (Ireland et al. 2020). We have been unable to detect GHRL<sup>+</sup> NEs in the  
527 adult airways using HCR (5 biological replicates). However, a small number of GHRL<sup>+</sup> cells are  
528 present within a tuft cell cluster in an integrated adult lung cell atlas containing 2.2 million cells  
529 (Sikkema et al. 2022), suggesting that GHRL<sup>+</sup> NEs could be a rare cell state in the adult airways.  
530 Given their relevance to human disease states, we sought to use our single cell atlas to identify  
531 lineage-defining TFs controlling NE cell differentiation and test these predictions using our  
532 organoid system. We reasoned that overexpression of lineage-defining transcription factors in lung  
533 tip organoids (Nikolić et al. 2017; Sun et al. 2021) would promote cell type-specific differentiation.  
534  
535 Multiple TFs were differentially expressed between pulmonary NE and GHRL<sup>+</sup> NE cells (Fig. 7B).  
536 We used SCENIC analysis of gene regulatory networks (GRNs) (Aibar et al. 2017) along a  
537 predicted airway progenitor to GHRL<sup>+</sup> NE trajectory (Fig. S13A,B) to identify putative lineage-  
538 defining TFs (Fig. 7G). ASCL1, NEUROD1 and NEUROG3 all emerged as potential key nodes  
539 and are required for endocrine cell differentiation in various organs (Borges et al. 1997; Ito et al.  
540 2000; Mellitzer et al. 2010; Naya et al. 1997). We also selected the GHRL<sup>+</sup> NE-specific *RFX6*  
541 (Fig. S13E) and *NKX2.2* (Fig. 7B), the pan-NE *PROX1* (Fig. 7B) and, as controls, the basal cell-  
542 specific TFs *DeltaNTP63*, *TFAP2A*, *PAX9*, and *mNeonGreen-3xNLS*. Overexpression of *PROX1*  
543 or *NKX2-2* did not result in NE gene upregulation based on qRT-PCR (not shown) and these TFs  
544 were not followed up. The other factors resulted in increased expression of basal or NE markers  
545 compared to *mNeonGreen-3xNLS* controls and the experiments were repeated using scRNA-seq.  
546 Individual TFs were overexpressed from a doxycycline-inducible construct for 3 days and  
547 organoids were maintained in the self-renewing (tip cell-promoting) medium throughout to  
548 rigorously assay the lineage-determining competence of the TF (Fig. 7H; S14A), followed by  
549 scRNA-seq.  
550



551 When mapped to epithelial cells of our fetal lung atlas, the majority of the *mNeonGreen-3xNLS*  
552 expressing organoid cells projected to mid-tip or -stalk cells as expected (Fig. 7I). Whereas,  
553 overexpression of *DeltaNTP63* resulted in basal cell-like lineages (S14B) consistent with a  
554 previous report (Warner et al. 2013), indicating that this simple assay can report TF function.  
555 Overexpression of *RFX6*, *TFAP2A* or *PAX9* did not result in the predicted lineage progression at  
556 a transcriptome level (S14B). However, *ASCL1*-overexpressing organoids progressed into  
557 pulmonary NE precursors (Fig. 7I) and *NEUROD1* overexpression promoted differentiation into  
558 *GHRL*<sup>+</sup> NE precursors (Fig. 7I). *NEUROG3* overexpression also led to *GHRL*<sup>+</sup> NE precursor  
559 formation (Fig. S14B), suggesting that the *GHRL*<sup>+</sup> NE lineage is the destination of the intermediate  
560 NE population (Fig. 7C).

561  
562 The 5' differences between the transgenes and endogenous TFs allowed us to distinguish these  
563 transcripts and infer gene regulation hierarchy. We observed autoregulation of *ASCL1*,  
564 *NEUROD1*, *NEUROG3* and *RFX6* (Fig. S14C). By contrast, *NKX2-2* and *PROX1* were  
565 upregulated by other TFs, indicating they are relatively low in the hierarchy (Fig. S14C). *NKX2-2*  
566 and *PROX1* expression in the organoid assay matched their expression in NE cells *in vivo* (Fig.  
567 7B, S14C), showing that this assay recapitulated key features of the TF network. These  
568 experiments have allowed us to test gene GRN predictions from the single cell atlas, confirm the  
569 predicted lineage trajectory and provide a foundation for studying human SCLC. This is significant  
570 given that there is no evidence that *GHRL*<sup>+</sup> NE cells are present in mice (Borromeo et al. 2016),  
571 making the use of mouse models difficult.

572

## 573 Discussion

574 Using a combination of single cell and spatial approaches we have identified 144 cell types, or  
575 states, in the developing human lungs across the 5-22 pcw period. We take advantage of a known  
576 proximal-distal gradient in epithelial differentiation to identify progenitor and differentiating states  
577 in the developing airway, including a new neuroendocrine cell subtype related to SCLC. We  
578 suggest that human alveolar epithelial differentiation follows a tip-stalk-AT2/1 fate decision  
579 pattern that is different to the prevailing cellular models of mouse alveolar development.  
580 Moreover, analysis of the mesenchymal compartment identified three niche regions with distinct  
581 signalling interactions, allowing us to identify signalling conditions that are sufficient for airway

582 differentiation of human embryonic lung organoids. We tested GRN predictions for NE cell  
583 differentiation in an organoid system, allowing us to identify lineage-defining TFs and provide  
584 directionality to the inferred differentiation trajectory. This study provides a paradigm for  
585 combining single cell datasets with spatial analysis of the tissue and functional analyses in a human  
586 organoid system to provide mechanistic insights into human development.

587

588 We show that lung maturation occurs in concert across cell compartments, for example epithelial  
589 AT1 cells and endothelial aerocytes differentiating in parallel at 20-22 pcw. Moreover, we have  
590 observed many aspects of cellular differentiation *in utero* showing that they are controlled by  
591 prenatal factors, rather than the transition to air breathing with its associated mechanical and  
592 hormonal changes. For example, two distinct types of vSMCs and lymphatic endothelial cells are  
593 established prior to major alterations in blood flow that occur postnatally.

594

595 The mesenchymal compartment contains multiple fibroblast and myofibroblast cell states and we  
596 focus on those present during the later stages of lung development. Airway, adventitial and  
597 alveolar fibroblasts are all localised in distinct niche regions and participate in different signalling  
598 interactions. Airway and adventitial fibroblasts both express unique combinations of signalling  
599 molecules and also form physical barriers between the neighbouring airway epithelium, or vascular  
600 endothelium, and the widespread alveolar fibroblasts (Fig. 4,5). Similarly, we characterise a  
601 population of myofibroblasts which contacts the developing epithelial stalk region and expresses  
602 high levels of the secreted Wnt-inhibitor, *NOTUM* (Fig. S10K); whereas alveolar fibroblasts  
603 express high levels of the canonical *WNT2* ligand (Fig. 4). In a separate study, using surface  
604 markers identified in this single cell atlas, we were able to specifically isolate alveolar fibroblasts  
605 and myofibroblast 2 cells and perform co-culture experiments with late tip organoids (Lim et al.  
606 2021). Those experiments confirmed that a three-way signalling interaction between alveolar  
607 fibroblasts, myofibroblast 2 cells and late tip cells can control human AT2 spatial patterning.

608

609 We find that *GHRL*<sup>+</sup> NE cells are transcriptionally similar to the *NEUROD1*<sup>+</sup> N-subtype of SCLC  
610 (Fig. 7). Our functional analyses of NE cell differentiation in organoids will provide tools to test  
611 these hypotheses. Mouse studies show that fetal transcriptional and chromatin cell states are  
612 accessed during the normal process of tissue regeneration and may contribute to neoplasm in

613 chronic inflammation (Larsen and Jensen 2021; Jadhav et al. 2017). Detailed ATAC-seq datasets  
614 are not yet available for human lung disease. Our high quality ATAC-seq atlas will provide a  
615 baseline for further analyses when adult chromatin accessibility lung atlases are published. In  
616 summary, our multi-component atlas is a community resource for future analyses of human  
617 development, regeneration and disease.

618

### 619 **Limitations of the study**

620 We provide a carefully annotated, descriptive cell atlas resource. Many conclusions are derived  
621 from trajectory inference or TF binding site analyses and require future validation. The trajectory  
622 inference analyses predict lineage relationships and transitions between cell types. However, these  
623 transitions reflect similarities in gene expression, for which direct differentiation processes are  
624 only one possible explanation. Further, they do not imply directionality. RNA velocity (used in  
625 Fig. 2D) provides directionality to trajectory inference predictions using the ratio of spliced versus  
626 unspliced mRNA and assuming steady-state transcription and degradation rates. However, over  
627 developmental time these assumptions are unlikely to hold across all developmental transitions,  
628 which can lead to the inference of incorrect directionality (Bergen et al. 2021). Similarly, when  
629 applying RNA velocity algorithms to scRNA-seq data of a known differentiation trajectory,  
630 reversed velocities have been reported (Gorin et al. 2022). For these reasons, we performed most  
631 of our trajectory inference analysis using Monocle3 (Trapnell et al. 2014). Monocle3 requires user-  
632 defined starting and end points and calculates the most likely routes between these points (shown  
633 as grey lines on the plots), guided by known biological features of the data (age and spatial  
634 arrangement of cells). A further confounding factor for trajectory inference in development is that  
635 upon maturation, some cell types are likely to act as progenitors themselves (Rawlins, Okubo, et  
636 al. 2009; Rock et al. 2009; Yang et al. 2018). Adding to the difficulty of reconstructing complete  
637 lineages, our single-cell dissociation protocols are expected to under-sample certain cells, such as  
638 mature neurons and chondrocytes. Furthermore, validation assays for lineage analysis in human  
639 systems rely on *in vitro* experiments, including organoid and iPSC differentiation. It is important  
640 to acknowledge that these usually define differentiation competence and do not necessarily mean  
641 that a specific differentiation route occurs *in vivo*.

642

643 We have performed data integration and regression analysis to compare the identity of our fetal  
644 human lung cells with adult human lung cells. There are approximately three decades between the  
645 oldest fetal and youngest adult human lung samples sequenced, including a rapid period of  
646 postnatal growth and morphogenesis, puberty and an unknown number of  
647 infections/environmental insults. Despite this, many fetal-adult similarities can be seen.  
648 Nevertheless, it will be important to sequence additional lungs and, when possible, to fill the age  
649 gap. Similarly, mouse-human fetal lung cell comparisons have discerned similarities and  
650 differences. However, the differences in experimental protocols and annotation granularity  
651 between the mouse and human data might have also contributed to the differences we see.  
652 Moreover, mice were selected as lab animals partly due to their small size and rapid gestation. It  
653 will be informative in the future to make comparisons with a range of fetal lungs, including larger,  
654 long-developing species such as pig and sheep, to distinguish between differences due to species,  
655 size and gestation period.

656

## 657 **Acknowledgements**

658 We would like to acknowledge the Gurdon Institute Imaging Facility, and the Cellular Genetics  
659 IT and Phenotyping group, New Pipeline Group and DNA pipelines of Sanger Institute; Menna  
660 Clatworthy and Muzz Haniffa and RE, CS, ED, IG, MH, CD, WS for discussions on cell-type  
661 annotations; MP, AP, SL and CT for informatics support. KL is supported by the Basic Science  
662 Research Program through the National Research Foundation of Korea (NRF) funded by the  
663 Ministry of Education (2018R1A6A3A03012122). DS is supported by a Wellcome Trust PhD  
664 studentship (109146/Z/15/Z) and the Department of Pathology, University of Cambridge. PH  
665 holds a non-stipendiary research fellowship at St Edmund's College, University of Cambridge.  
666 EM is supported by ESPOD fellowship of EMBL-EBI and Sanger Institute. JPP is supported by  
667 the MSCA Postdoctoral Fellowship. ELR is supported by the MRC (MR/P009581/1;  
668 MR/S035907/1). ZD is supported by a Wellcome Trust PhD studentship (222275/Z/20/Z). RAB  
669 is supported by the NIHR Cambridge Biomedical Research Centre (BRC-1215-20014) and was  
670 an NIHR senior investigator. Gurdon Institute Core support from the Wellcome Trust  
671 (203144/Z/16/Z) and Cancer Research UK (C6946/A24843). KBM, JCM and SAT acknowledge  
672 funding from the MRC (MR/S035907/1) and from Wellcome (WT211276/Z/18/Z and Sanger core  
673 grant WT206194). MZN acknowledges funding from a MRC Clinician Scientist Fellowship

674 (MR/W00111X/1), the Rosetrees Trust (M899) and Action Medical Research (GN2911). This  
675 work was partly undertaken at UCLH/UCL who received a proportion of funding from the  
676 Department of Health's NIHR Biomedical Research Centre's funding scheme.

677

#### 678 **Author Contributions**

679 Conceptualization: PH, KL, DS, KBM and ELR. Methodology: PH, KL, DS. Software: PH.  
680 Formal Analysis: PH, JPP, KP, ZKT. Investigation: KL, DS, QJ, ZD, LB, LR, LM, MD, AW and  
681 MY. Resources: EM, XH, RAB, SMJ. Data Curation: PH, KL, DS, EM, ZKT, ED, CS, IG. Writing  
682 - original draft: PH, KL, DS, JPP, KBM and ELR. Writing - review and editing: PH, KL, DS,  
683 KBM, ELR, SAT, JBM. Supervision: MZN, RAB, SAT, JBM, KBM and ELR. Funding  
684 Acquisition: KL, EM, JPP, RAB, MZN, SAT, JBM, KBM and ELR.

685

#### 686 **Declaration of Interests**

687 SAT is a member of the Scientific Advisory Board for the following companies: Biogen, Foresite  
688 Labs, GSK, Qiagen, CRG Barcelona, Jax Labs, SciLife Lab, Allen Institute. She is a consultant  
689 for Genentech and Roche. She is co-founder of Transition Bio and a member of the Board. ZKT  
690 has received consulting fees from Synteny Biotechnologies for activities unrelated to this work.

691

692

693

694

## 695 REFERENCES

- 696 Aibar, Sara, Carmen Bravo González-Blas, Thomas Moerman, Vân Anh Huynh-Thu, Hana  
697 Imrichova, Gert Hulselmans, Florian Rambow, et al. 2017. “SCENIC: Single-Cell Regulatory  
698 Network Inference and Clustering.” *Nature Methods* 14 (11): 1083–86.
- 699 Alanis, Denise Martinez, Daniel R. Chang, Haruhiko Akiyama, Mark A. Krasnow, and Jichao  
700 Chen. 2014. “Two Nested Developmental Waves Demarcate a Compartment Boundary in the  
701 Mouse Lung.” *Nature Communications* 5 (1): 1–15.
- 702 Bergen, Volker, Ruslan A. Soldatov, Peter V. Kharchenko, and Fabian J. Theis. 2021. “RNA  
703 Velocity-Current Challenges and Future Perspectives.” *Molecular Systems Biology* 17 (8):  
704 e10282.
- 705 Blenkinsopp, W. K. 1967. “Proliferation of Respiratory Tract Epithelium in the Rat.” *Experimental*  
706 *Cell Research* 46 (1): 144–54.
- 707 Borges, M., R. I. Linnoila, H. J. van de Velde, H. Chen, B. D. Nelkin, M. Mabry, S. B. Baylin, and  
708 D. W. Ball. 1997. “An Achaete-Scute Homologue Essential for Neuroendocrine  
709 Differentiation in the Lung.” *Nature* 386 (6627): 852–55.
- 710 Borromeo, Mark D., Trisha K. Savage, Rahul K. Kollipara, Min He, Alexander Augustyn, Jihan  
711 K. Osborne, Luc Girard, et al. 2016. “ASCL1 and NEUROD1 Reveal Heterogeneity in  
712 Pulmonary Neuroendocrine Tumors and Regulate Distinct Genetic Programs.” *Cell Reports*  
713 16 (5): 1259–72.
- 714 Burri, P. H. 1984. “Fetal and Postnatal Development of the Lung.” *Annual Review of Physiology*  
715 46: 617–28.
- 716 Cao, Junyue, Diana R. O’Day, Hannah A. Pliner, Paul D. Kingsley, Mei Deng, Riza M. Daza,  
717 Michael A. Zager, et al. 2020. “A Human Cell Atlas of Fetal Gene Expression.” *Science* 370  
718 (6518). <https://doi.org/10.1126/science.aba7721>.
- 719 Carraro, Gianni, Justin Langerman, Shan Sabri, Zareeb Lorenzana, Arunima Purkayastha,  
720 Guangzhu Zhang, Bindu Konda, et al. 2021. “Transcriptional Analysis of Cystic Fibrosis  
721 Airways at Single-Cell Resolution Reveals Altered Epithelial Cell States and Composition.”  
722 *Nature Medicine* 27 (5): 806–14.
- 723 Carraro, Gianni, and Barry R. Stripp. 2022. “Insights Gained in the Pathology of Lung Disease  
724 through Single-Cell Transcriptomics.” *The Journal of Pathology* 257 (4): 494–500.
- 725 Corada, Monica, Fabrizio Orsenigo, Marco Francesco Morini, Mara Elena Pitulescu, Ganesh Bhat,  
726 Daniel Nyqvist, Ferruccio Breviario, et al. 2013. “Sox17 Is Indispensable for Acquisition and  
727 Maintenance of Arterial Identity.” *Nature Communications* 4: 2609.
- 728 Cutz, E., J. E. Gillan, and A. C. Bryan. 1985. “Neuroendocrine Cells in the Developing Human  
729 Lung: Morphologic and Functional Considerations.” *Pediatric Pulmonology* 1 (3 Suppl):  
730 S21–29.



- 731 Dahlgren, Madelene W., and Ari B. Molofsky. 2019. “Adventitial Cuffs: Regional Hubs for Tissue  
732 Immunity.” *Trends in Immunology* 40 (10): 877–87.
- 733 Deprez, Marie, Laure-Emmanuelle Zaragosi, Marin Truchi, Christophe Becavin, Sandra Ruiz  
734 García, Marie-Jeanne Arguel, Magali Plaisant, et al. 2020. “A Single-Cell Atlas of the Human  
735 Healthy Airways.” *American Journal of Respiratory and Critical Care Medicine* 202 (12):  
736 1636–45.
- 737 Domcke, Silvia, Andrew J. Hill, Riza M. Daza, Junyue Cao, Diana R. O’Day, Hannah A. Pliner,  
738 Kimberly A. Aldinger, et al. 2020. “A Human Cell Atlas of Fetal Chromatin Accessibility.”  
739 *Science*, November. <https://doi.org/10.1126/science.aba7612>.
- 740 Efremova, Mirjana, Miquel Vento-Tormo, Sarah A. Teichmann, and Roser Vento-Tormo. 2020.  
741 “CellPhoneDB: Inferring Cell–cell Communication from Combined Expression of Multi-  
742 Subunit Ligand–receptor Complexes.” *Nature Protocols* 15 (4): 1484–1506.
- 743 Frank, David B., Ian J. Penkala, Jarod A. Zepp, Aravind Sivakumar, Ricardo Linares-Saldana,  
744 William J. Zacharias, Katharine G. Stolz, et al. 2019. “Early Lineage Specification Defines  
745 Alveolar Epithelial Ontogeny in the Murine Lung.” *Proceedings of the National Academy of  
746 Sciences of the United States of America* 116 (10): 4362–71.
- 747 Frid, M. G., E. C. Dempsey, A. G. Durmowicz, and K. R. Stenmark. 1997. “Smooth Muscle Cell  
748 Heterogeneity in Pulmonary and Systemic Vessels. Importance in Vascular Disease.”  
749 *Arteriosclerosis, Thrombosis, and Vascular Biology* 17 (7): 1203–9.
- 750 Gao, Xia, Christopher M. Vockley, Florencia Pauli, Kimberly M. Newberry, Yan Xue, Scott H.  
751 Randell, Timothy E. Reddy, and Brigid L. M. Hogan. 2013. “Evidence for Multiple Roles for  
752 Grainyhead-like 2 in the Establishment and Maintenance of Human Mucociliary Airway  
753 Epithelium.[corrected].” *Proceedings of the National Academy of Sciences of the United  
754 States of America* 110 (23): 9356–61.
- 755 Gay, Carl M., C. Allison Stewart, Elizabeth M. Park, Lixia Diao, Sarah M. Groves, Simon Heeke,  
756 Barzin Y. Nabet, et al. 2021. “Patterns of Transcription Factor Programs and Immune  
757 Pathway Activation Define Four Major Subtypes of SCLC with Distinct Therapeutic  
758 Vulnerabilities.” *Cancer Cell* 39 (3): 346–60.e7.
- 759 Gillich, Astrid, Fan Zhang, Colleen G. Farmer, Kyle J. Travaglini, Serena Y. Tan, Mingxia Gu,  
760 Bin Zhou, Jeffrey A. Feinstein, Mark A. Krasnow, and Ross J. Metzger. 2020. “Capillary  
761 Cell-Type Specialization in the Alveolus.” *Nature* 586 (7831): 785–89.
- 762 Gorin, Gennady, Meichen Fang, Tara Chari, and Lior Pachter. 2022. “RNA Velocity Unraveled.”  
763 *bioRxiv*. <https://doi.org/10.1101/2022.02.12.480214>.
- 764 Guha, Arjun, Michelle Vasconcelos, Yan Cai, Mitsuhiro Yoneda, Anne Hinds, Jun Qian, Guihua  
765 Li, et al. 2012. “Neuroepithelial Body Microenvironment Is a Niche for a Distinct Subset of  
766 Clara-like Precursors in the Developing Airways.” *Proceedings of the National Academy of  
767 Sciences of the United States of America* 109 (31): 12592–97.
- 768 Hawkins, Finn J., Shingo Suzuki, Mary Lou Beermann, Cristina Barillà, Ruobing Wang, Carlos

- 769 Villacorta-Martin, Andrew Berical, et al. 2021. “Derivation of Airway Basal Stem Cells from  
770 Human Pluripotent Stem Cells.” *Cell Stem Cell* 28 (1): 79–95.e8.
- 771 Hein, Renee F. C., Joshua H. Wu, Emily M. Holloway, Tristan Frum, Ansley S. Conchola, Yu-  
772 Hwai Tsai, Angeline Wu, et al. 2022. “R-SPONDIN2+ Mesenchymal Cells Form the Bud  
773 Tip Progenitor Niche during Human Lung Development.” *Developmental Cell*, June.  
774 <https://doi.org/10.1016/j.devcel.2022.05.010>.
- 775 He, Peng, Brian A. Williams, Diane Trout, Georgi K. Marinov, Henry Amrhein, Libera Berghella,  
776 Say-Tar Goh, et al. 2020. “The Changing Mouse Embryo Transcriptome at Whole Tissue and  
777 Single-Cell Resolution.” *Nature* 583 (7818): 760–67.
- 778 Herbert, Shane P., and Didier Y. R. Stainier. 2011. “Molecular Control of Endothelial Cell  
779 Behaviour during Blood Vessel Morphogenesis.” *Nature Reviews. Molecular Cell Biology*  
780 12 (9): 551–64.
- 781 Ireland, Abbie S., Alexi M. Micinski, David W. Kastner, Bingqian Guo, Sarah J. Wait, Kyle B.  
782 Spainhower, Christopher C. Conley, et al. 2020. “MYC Drives Temporal Evolution of Small  
783 Cell Lung Cancer Subtypes by Reprogramming Neuroendocrine Fate.” *Cancer Cell* 38 (1):  
784 60–78.e12.
- 785 Ito, T., N. Udaka, T. Yazawa, K. Okudela, H. Hayashi, T. Sudo, F. Guillemot, R. Kageyama, and  
786 H. Kitamura. 2000. “Basic Helix-Loop-Helix Transcription Factors Regulate the  
787 Neuroendocrine Differentiation of Fetal Mouse Pulmonary Epithelium.” *Development* 127  
788 (18): 3913–21.
- 789 Jadhav, Unmesh, Madhurima Saxena, Nicholas K. O’Neill, Assieh Saadatpour, Guo-Cheng Yuan,  
790 Zachary Herbert, Kazutaka Murata, and Ramesh A. Shivdasani. 2017. “Dynamic  
791 Reorganization of Chromatin Accessibility Signatures during Dedifferentiation of Secretory  
792 Precursors into Lgr5+ Intestinal Stem Cells.” *Cell Stem Cell* 21 (1): 65–77.e5.
- 793 Kaarteenaho, Riitta, Heta Merikallio, Siri Lehtonen, Terttu Harju, and Ylermi Soini. 2010.  
794 “Divergent Expression of Claudin -1, -3, -4, -5 and -7 in Developing Human Lung.”  
795 *Respiratory Research* 11 (May): 59.
- 796 Kimura, S., E. J. Ostrin, and J. Chen. 2019. “Transcriptional Control of Lung Alveolar Type 1 Cell  
797 Development and Maintenance by NK Homeobox 2-1.” *Proceedings of the*.  
798 <https://www.pnas.org/content/116/41/20545.short>.
- 799 Kumar, Maya E., Patrick E. Bogard, F. Hernán Espinoza, Douglas B. Menke, David M. Kingsley,  
800 and Mark A. Krasnow. 2014. “Mesenchymal Cells. Defining a Mesenchymal Progenitor  
801 Niche at Single-Cell Resolution.” *Science* 346 (6211): 1258810.
- 802 Larsen, Hjalte L., and Kim B. Jensen. 2021. “Reprogramming Cellular Identity during Intestinal  
803 Regeneration.” *Current Opinion in Genetics & Development* 70 (October): 40–47.
- 804 Liberti, Derek C., William A. Liberti Iii, Madison M. Kremp, Ian J. Penkala, Fabian L. Cardenas-  
805 Diaz, Michael P. Morley, Apoorva Babu, Su Zhou, Rafael J. Fernandez Iii, and Edward E.  
806 Morrissey. 2022. “Klf5 Defines Alveolar Epithelial Type 1 Cell Lineage Commitment during



- 807 Lung Development and Regeneration.” *Developmental Cell*, July.  
808 <https://doi.org/10.1016/j.devcel.2022.06.007>.
- 809 Lim, K., W. Tang, D. Sun, H. Peng, S. Teichmann, J. C. Marioni, K. B. Meyer, and E. L. Rawlins.  
810 2021. “Acquisition of Alveolar Fate and Differentiation Competence by Human Fetal Lung  
811 Epithelial Progenitor Cells.” *bioRxiv*.  
812 <https://www.biorxiv.org/content/10.1101/2021.06.30.450501.abstract>.
- 813 Li, Rongbo, Xiaoping Li, James Hagood, Min-Sheng Zhu, and Xin Sun. 2020. “Myofibroblast  
814 Contraction Is Essential for Generating and Regenerating the Gas-Exchange Surface.” *The*  
815 *Journal of Clinical Investigation* 130 (6): 2859–71.
- 816 Lopez, Romain, Jeffrey Regier, Michael B. Cole, Michael I. Jordan, and Nir Yosef. 2018. “Deep  
817 Generative Modeling for Single-Cell Transcriptomics.” *Nature Methods* 15 (12): 1053–58.
- 818 Madissoon, Elo, Amanda J. Oliver, Vitalii Kleshchevnikov, Anna Wilbrey-Clark, Krzysztof  
819 Polanski, Ana Ribeiro Orsi, Lira Mamanova, et al. 2021. “A Spatial Multi-Omics Atlas of the  
820 Human Lung Reveals a Novel Immune Cell Survival Niche.” *bioRxiv*.  
821 <https://doi.org/10.1101/2021.11.26.470108>.
- 822 Mellitzer, Georg, Anthony Beucher, Viviane Lobstein, Pascal Michel, Sylvie Robine, Michèle  
823 Kedinger, and Gérard Gradwohl. 2010. “Loss of Enteroendocrine Cells in Mice Alters Lipid  
824 Absorption and Glucose Homeostasis and Impairs Postnatal Survival.” *The Journal of*  
825 *Clinical Investigation* 120 (5): 1708–21.
- 826 Miller, Alyssa J., David R. Hill, Melinda S. Nagy, Yoshiro Aoki, Briana R. Dye, Alana M. Chin,  
827 Sha Huang, et al. 2018. “In Vitro Induction and In Vivo Engraftment of Lung Bud Tip  
828 Progenitor Cells Derived from Human Pluripotent Stem Cells.” *Stem Cell Reports* 10 (1):  
829 101–19.
- 830 Miller, Alyssa J., Qianhui Yu, Michael Czerwinski, Yu-Hwai Tsai, Renee F. Conway, Angeline  
831 Wu, Emily M. Holloway, et al. 2020. “In Vitro and In Vivo Development of the Human  
832 Airway at Single-Cell Resolution.” *Developmental Cell* 53 (1): 117–28.e6.
- 833 Mou, Hongmei, Vladimir Vinarsky, Purushothama Rao Tata, Karissa Brazauskas, Soon H. Choi,  
834 Adrienne K. Crooke, Bing Zhang, et al. 2016. “Dual SMAD Signaling Inhibition Enables  
835 Long-Term Expansion of Diverse Epithelial Basal Cells.” *Cell Stem Cell* 19 (2): 217–31.
- 836 Naya, F. J., H. P. Huang, Y. Qiu, H. Mutoh, F. J. DeMayo, A. B. Leiter, and M. J. Tsai. 1997.  
837 “Diabetes, Defective Pancreatic Morphogenesis, and Abnormal Enteroendocrine  
838 Differentiation in BETA2/neuroD-Deficient Mice.” *Genes & Development* 11 (18): 2323–34.
- 839 Negretti, Nicholas M., Erin J. Plosa, John T. Benjamin, Bryce A. Schuler, A. Christian Habermann,  
840 Christopher Jetter, Peter Gulleman, et al. 2021. “A Single Cell Atlas of Lung Development.”  
841 *bioRxiv*. <https://doi.org/10.1101/2021.01.21.427641>.
- 842 Negretti, Nicholas M., Erin J. Plosa, John T. Benjamin, Bryce A. Schuler, A. Christian Habermann,  
843 Christopher S. Jetter, Peter Gulleman, et al. 2021. “A Single-Cell Atlas of Mouse Lung  
844 Development.” *Development* 148 (24). <https://doi.org/10.1242/dev.199512>.

- 845 Nikolić, Marko Z., Oriol Caritg, Quitz Jeng, Jo-Anne Johnson, Dawei Sun, Kate J. Howell, Jane  
846 L. Brady, et al. 2017. “Human Embryonic Lung Epithelial Tips Are Multipotent Progenitors  
847 That Can Be Expanded in Vitro as Long-Term Self-Renewing Organoids.” *eLife* 6 (June).  
848 <https://doi.org/10.7554/eLife.26575>.
- 849 Nikolić, Marko Z., Dawei Sun, and Emma L. Rawlins. 2018. “Human Lung Development: Recent  
850 Progress and New Challenges.” *Development* 145 (16). <https://doi.org/10.1242/dev.163485>.
- 851 Ouadah, Youcef, Enrique R. Rojas, Daniel P. Riordan, Sarah Capostagno, Christin S. Kuo, and  
852 Mark A. Krasnow. 2019. “Rare Pulmonary Neuroendocrine Cells Are Stem Cells Regulated  
853 by Rb, p53, and Notch.” *Cell* 179 (2): 403–16.e23.
- 854 Quaggin, S. E., L. Schwartz, S. Cui, P. Igarashi, J. Deimling, M. Post, and J. Rossant. 1999. “The  
855 Basic-Helix-Loop-Helix Protein pod1 Is Critically Important for Kidney and Lung  
856 Organogenesis.” *Development* 126 (24): 5771–83.
- 857 Rawlins, Emma L., Cheryl P. Clark, Yan Xue, and Brigid L. M. Hogan. 2009. “The Id2+ Distal  
858 Tip Lung Epithelium Contains Individual Multipotent Embryonic Progenitor Cells.”  
859 *Development* 136 (22): 3741–45.
- 860 Rawlins, Emma L., and Brigid L. M. Hogan. 2008. “Ciliated Epithelial Cell Lifespan in the Mouse  
861 Trachea and Lung.” *American Journal of Physiology. Lung Cellular and Molecular  
862 Physiology* 295 (1): L231–34.
- 863 Rawlins, Emma L., Tadashi Okubo, Yan Xue, David M. Brass, Richard L. Auten, Hiroshi  
864 Hasegawa, Fan Wang, and Brigid L. M. Hogan. 2009. “The Role of Scgb1a1+ Clara Cells in  
865 the Long-Term Maintenance and Repair of Lung Airway, but Not Alveolar, Epithelium.” *Cell  
866 Stem Cell* 4 (6): 525–34.
- 867 Rawlins, Emma L., Lawrence E. Ostrowski, Scott H. Randell, and Brigid L. M. Hogan. 2007.  
868 “Lung Development and Repair: Contribution of the Ciliated Lineage.” *Proceedings of the  
869 National Academy of Sciences of the United States of America* 104 (2): 410–17.
- 870 Rock, Jason R., Mark W. Onaitis, Emma L. Rawlins, Yun Lu, Cheryl P. Clark, Yan Xue, Scott H.  
871 Randell, and Brigid L. M. Hogan. 2009. “Basal Cells as Stem Cells of the Mouse Trachea  
872 and Human Airway Epithelium.” *Proceedings of the National Academy of Sciences of the  
873 United States of America* 106 (31): 12771–75.
- 874 Schupp, Jonas C., Taylor S. Adams, Carlos Cosme Jr, Micha Sam Brickman Raredon, Yifan Yuan,  
875 Norihito Omote, Sergio Poli, et al. 2021. “Integrated Single-Cell Atlas of Endothelial Cells  
876 of the Human Lung.” *Circulation* 144 (4): 286–302.
- 877 Sikkema, L., D. Strobl, L. Zappia, E. Madisson, N. S. Markov, L. Zaragosi, M. Ansari, et al.  
878 2022. “An Integrated Cell Atlas of the Human Lung in Health and Disease.” *bioRxiv*.  
879 <https://doi.org/10.1101/2022.03.10.483747>.
- 880 Soldt, Benjamin J. van, Jun Qian, Jiao Li, Nan Tang, Jining Lu, and Wellington V. Cardoso. 2019.  
881 “Yap and Its Subcellular Localization Have Distinct Compartment-Specific Roles in the  
882 Developing Lung.” *Development* 146 (9). <https://doi.org/10.1242/dev.175810>.

- 883 Sun, Dawei, Lewis Evans, Francesca Perrone, Vanesa Sokleva, Kyungtae Lim, Saba Rezakhani,  
884 Matthias Lutolf, Matthias Zilbauer, and Emma L. Rawlins. 2021. “A Functional Genetic  
885 Toolbox for Human Tissue-Derived Organoids.” *eLife* 10 (October).  
886 <https://doi.org/10.7554/eLife.67886>.
- 887 Takeda, Akira, Maija Hollmén, Denis Dermadi, Junliang Pan, Kevin Francis Brulois, Riina  
888 Kaukonen, Tapio Lönnberg, et al. 2019. “Single-Cell Survey of Human Lymphatics Unveils  
889 Marked Endothelial Cell Heterogeneity and Mechanisms of Homing for Neutrophils.”  
890 *Immunity* 51 (3): 561–72.e5.
- 891 Trapnell, Cole, Davide Cacchiarelli, Jonna Grimsby, Prapti Pokharel, Shuqiang Li, Michael  
892 Morse, Niall J. Lennon, Kenneth J. Livak, Tarjei S. Mikkelsen, and John L. Rinn. 2014. “The  
893 Dynamics and Regulators of Cell Fate Decisions Are Revealed by Pseudotemporal Ordering  
894 of Single Cells.” *Nature Biotechnology* 32 (4): 381–86.
- 895 Travaglini, Kyle J., Ahmad N. Nabhan, Lolita Penland, Rahul Sinha, Astrid Gillich, Rene V. Sit,  
896 Stephen Chang, et al. 2020. “A Molecular Cell Atlas of the Human Lung from Single-Cell  
897 RNA Sequencing.” *Nature* 587 (7835): 619–25.
- 898 Trivedi, Vikas, Harry M. T. Choi, Scott E. Fraser, and Niles A. Pierce. 2018. “Multidimensional  
899 Quantitative Analysis of mRNA Expression within Intact Vertebrate Embryos.” *Development*  
900 145 (1). <https://doi.org/10.1242/dev.156869>.
- 901 Vieira Braga, Felipe A., Gozde Kar, Marijn Berg, Orestes A. Carpaij, Krzysztof Polanski, Lukas  
902 M. Simon, Sharon Brouwer, et al. 2019. “A Cellular Census of Human Lungs Identifies Novel  
903 Cell States in Health and in Asthma.” *Nature Medicine* 25 (7): 1153–63.
- 904 Vila Ellis, Lisandra, Margo P. Cain, Vera Hutchison, Per Flodby, Edward D. Crandall, Zea Borok,  
905 Bin Zhou, Edwin J. Ostrin, Joshua D. Wythe, and Jichao Chen. 2020. “Epithelial Vegfa  
906 Specifies a Distinct Endothelial Population in the Mouse Lung.” *Developmental Cell* 52 (5):  
907 617–30.e6.
- 908 Wan, Huajing, Sharon Dingle, Yan Xu, Valérie Besnard, Klaus H. Kaestner, Siew-Lan Ang, Susan  
909 Wert, Mildred T. Stahlman, and Jeffrey A. Whitsett. 2005. “Compensatory Roles of Foxa1  
910 and Foxa2 during Lung Morphogenesis \*.” *The Journal of Biological Chemistry* 280 (14):  
911 13809–16.
- 912 Warner, Stephanie M. B., Tillie-Louise Hackett, Furquan Shaheen, Teal S. Hallstrand, Anthony  
913 Kicic, Stephen M. Stick, and Darryl A. Knight. 2013. “Transcription Factor p63 Regulates  
914 Key Genes and Wound Repair in Human Airway Epithelial Basal Cells.” *American Journal*  
915 *of Respiratory Cell and Molecular Biology* 49 (6): 978–88.
- 916 Yang, Ying, Paul Riccio, Michael Schotsaert, Munemasa Mori, Jining Lu, Dong-Kee Lee, Adolfo  
917 García-Sastre, Jianming Xu, and Wellington V. Cardoso. 2018. “Spatial-Temporal Lineage  
918 Restrictions of Embryonic p63+ Progenitors Establish Distinct Stem Cell Pools in Adult  
919 Airways.” *Developmental Cell* 44 (6): 752–61.e4.
- 920 Yao, Erica, Chuwen Lin, Qingzhe Wu, Kuan Zhang, Hai Song, and Pao-Tien Chuang. 2018.  
921 “Notch Signaling Controls Transdifferentiation of Pulmonary Neuroendocrine Cells in

922           Response to Lung Injury.” *Stem Cells* 36 (3): 377–91.

923   Zepp, Jarod A., Michael P. Morley, Claudia Loebel, Madison M. Kremp, Fatima N. Chaudhry,  
924   Maria C. Basil, John P. Leach, et al. 2021. “Genomic, Epigenomic, and Biophysical Cues  
925   Controlling the Emergence of the Lung Alveolus.” *Science* 371 (6534).  
926   <https://doi.org/10.1126/science.abc3172>.

927

928

## 929 **FIGURE LEGENDS**

930

### 931 **Figure 1. Experimental overview.**

932 (A) Overview of sample collection for scRNA-seq (circles) and scATAC-seq (squares)  
933 experiments from whole lung (purple), distal (red) and proximal (blue) regions, cell processing  
934 and broad clustering; cluster number refers to the data portal (<https://lungcellatlas.org>).

935 (B) UMAP representation of ~80,000 good quality cells, indicating epithelial, endothelial,  
936 fibroblasts and leukocyte/erythroid compartments.

937 (C) Cell type proportions of the whole lung over developmental time.

938 See also Figures S1, S2, S3 and S9.

### 939 **Figure 2. Epithelial cell types, states and location over developmental time**

940 (A, B) UMAP visualisation of epithelial cells, coloured by cell types (A), stage (B, *left*), and region  
941 (B, *right*).

942 (C) Dot plot describing differential marker gene expression level for epithelial cells.

943 (D) UMAP visualising the predicted epithelial cell lineage trajectory using scvelo, inset:  
944 developmental age.

945 (E, F) *In situ* HCR at 11 (F) and 12 (E) pcw. (E) *SOX9* (tip epithelium, white), *CYTL1* (red),  
946 *SCGB3A2* (green). (F) *GHRL*<sup>+</sup> (*GHRL*<sup>+</sup> neuroendocrine, red), *GRP*<sup>+</sup> (pulmonary neuroendocrine,  
947 green).

948 (G) Dot plot showing differential marker genes across secretory cell subtypes.

949 (H) *In situ* HCR at 19 pcw using *SCGB1A1* (red), *SCGB3A2* (green), and *SCGB3A1* (white).

950 (I-J) Differentially enriched genes in the proximal secretory cell subtypes. *SPDEF* (I, I'), *MUC5B*  
951 (I''), and *SERPINA1* (I'''), *CYP2F1* (J), *MUC4* (J'), *KRT4* (J'') all white; *SCGB1A1* (red) and  
952 *SCGB3A2* (green).

953 DAPI, nuclei. Scale bars, 50  $\mu$ m.

954 See also Figures S4, S5 and S6.

### 955 **Figure 3. Late epithelial tip cells acquire an alveolar progenitor identity**

956 (A, B) *In situ* HCR at 11 (A, B), 15 (B), and 19 (A) pcw. (A) *SFTPC* (green), *TPPP3* (red), *SOX9*  
957 (white). (B) *SFTPC* (green), *SFTPA1* (red), *STC1* (white). Dashed lines: tip epithelium.

958 (C,D) UMAP visualisation of early to late tip, late stalk, fetal AT1 and AT2 cells, coloured by cell  
959 types (C) and stages (C'); PAGA analysis (C''); Monocle3 trajectories (D).  
960 (E) Gene expression heatmap of trajectory coloured in D.  
961 (F) *In situ* HCR at 16, 19, and 21 pcw, *SFTPC* (green), *TPPP3* (red), and *SOX9* (white). White  
962 lines/red arrows: columnar tip prognitors, *SFTPC*<sup>+</sup>/*SOX9*<sup>+/high</sup>/*TPPP3*<sup>+</sup>. Arrowheads/dashed lines  
963 in stalk/air sac regions: cuboidal differentiating fetal AT2 cells, *SFTPC*<sup>+</sup>/*SOX9*<sup>low/-</sup>/*TPPP3*<sup>low/-</sup>.  
964 Asterisk (\*) primitive air sacs.  
965 (G) Quantification of cuboidal *SFTPC*<sup>+</sup>/*SOX9*<sup>low/-</sup> fetal AT2 cells in stalk/air sac regions in F. The  
966 *SFTPC*<sup>+</sup> tip epithelial cells were excluded by their columnar morphology and marker expression  
967 (*SOX9*<sup>low/-</sup>). Mean ± SD, n >7. Significance evaluated by 1-way ANOVA with Tukey multiple  
968 comparison post-test; ns: not significant, \**P*<0.05, \*\**P*<0.01, \*\*\**P*<0.001, \*\*\*\**P*<0.0001.  
969 (H, I) *In situ* HCR analysis at 21 pcw. Fetal AT2 *SFTPC*<sup>+</sup> and *NAPSA*<sup>+</sup> (arrowheads; H, I) and  
970 fetal AT1 *SFTPC*<sup>-</sup>/*MMP28*<sup>+</sup>/*SPOCK2*<sup>+</sup> (arrows; I).  
971 (J) Diagram of the acquisition of alveolar progenitor identity by late epithelial tips, followed by  
972 differentiation to fetal AT2 and AT1 lineages.  
973 DAPI, nuclei. Scale bars, 50 μm.  
974 See also Figure S7 and S8.

975 **Figure 4. Diverse mesenchymal cell types localise to distinct niches in the developing human**  
976 **lung.**

977 (A) UMAP visualisation of mesenchymal cells.  
978 (B) Dot plot describing mesenchymal differential marker gene expression.  
979 (C) UMAP visualisation of mesenchymal cells coloured by stage.  
980 (D) Visium spatial feature plots visualising adventitial fibroblasts, airway fibroblasts, ASPN+  
981 chondrocytes, and myofibroblasts-2 on 17 and 20 pcw lung sections. Scores are conservative  
982 estimates of cell-type abundance per voxel.  
983 (E-H) *In situ* HCR assay (E-H) and immunostaining (G). (E) Adventitial fibroblasts  
984 (*SFRP2*,white/*PII6*,red; arrowheads), ECs (*PECAMI*, green). (F) Alveolar fibroblasts (*WNT2*  
985 white; *FGFR4* red), tip cells (*SFTPC* green). Asterisks (\*) myofibroblasts). (G) Airway fibroblasts  
986 (*S100A4* red; *AGTR2* white), smooth muscle (*ACTA2* green, dashed line). (H) Myofibroblasts



987 (*KCNK17* white, *CXCL14* red; arrowheads), tip cells (*SFTPC*, green). DAPI, nuclei. Scale bars,  
988 50  $\mu\text{m}$ .

989 (I) UMAP visualisation of cell types (I), stage (I') and PAGA analysis (I'') of fibroblast  
990 differentiation trajectories, .

991 (J, K) UMAPs with Monocle3 trajectories (J) and selected trajectory gene expression heatmaps  
992 (K) for mid tip to adventitial fibroblasts (top), alveolar fibroblasts (middle), or airway fibroblasts  
993 (bottom).

994 See also Figure S10.

995 **Figure 5. Signalling ligand-receptor interactions in alveolar and airway niches.**

996 (A, B) Curated ligand–receptor interaction predictions from CellPhoneDB in alveolar (A) and  
997 airway (B) niches. Dot plots visualise gene expression by cell type; dashed arrows indicate the  
998 predicted direction of signalling.

999 (C-E) Immunofluorescence/HCR. *S100A4/S100A4*, airway fibroblasts; *ACTA2*, ASM; *CD44*, tip  
1000 epithelium; *PECAM1*, ECs. Airway fibroblasts/ASM form a boundary (dashed lines) between  
1001 alveolar and airway regions. Lines are between airway fibroblasts/SMCs and airway epithelium.  
1002 DAPI, nuclei. Scale bars, 50  $\mu\text{m}$ .

1003 (F) Organoids were cultured in FGF7/10-containing medium, in the presence (self-renewal  
1004 medium; SNM) or absence (differentiation medium; DM) of CHIR99021, for 30 days.

1005 (G) qRT-PCR quantifications normalised to the organoids cultured in SNM. Significance  
1006 evaluated by 2-way ANOVA with Tukey multiple comparison post-test; \* $P<0.05$ , \*\* $P<0.01$ ,  
1007 \*\*\* $P<0.001$ ;  $n=6$  organoid lines.

1008 (H) Whole mount immunofluorescence of lung organoids cultured in self-renewal medium (upper)  
1009 and differentiation medium (lower). DAPI, nuclei. Scale bar, 25  $\mu\text{m}$ .

1010 See also Figure S11.

1011 **Figure 6. DNA accessibility and motif enrichment revealed by scATAC-seq.**

1012 (A) Single-cell DNA accessibility profiles mapped onto 2D UMAP plane. Coloured for cell states.

1013 (B) A union set of top 10 enriched motifs in the marker peaks among epithelial cell types/states.  
1014 Statistical significance is visualised as a heatmap according to the colour bar below. Transcription  
1015 factors concordantly expressed based on scRNA-seq data are marked with asterisks.

1016 (C) Expression dotplot of the concordant transcription factors from (B) in epithelial cell types.  
1017 (D-E) Read coverage tracks of in silico aggregated “pseudo-bulk” epithelial clusters over the GRP  
1018 locus (D) and GHRL locus (E).  
1019 See also Figure S12.

1020 **Figure 7. *ASCL1* and *NEUROD1* regulate the formation of two subtypes of neuroendocrine**  
1021 **cells.**

1022 (A) Zoom-in UMAP plot of NE lineages.  
1023 (B) Dot plot showing selected gene expression in NE lineages.  
1024 (C) Schematic model of NE lineage formation.  
1025 (D) Left: HCR, *GRP* (green), *GHRL* (red), *ASCL1* (white). Right: Mean  $\pm$  SEM of *ASCL1*<sup>+</sup> cell  
1026 types, N = 3 human fetal lungs, n = 243 *ASCL1*<sup>+</sup> cells.  
1027 (E) Left: HCR, *GRP* (green), *NEUROD1* (red), *GHRL* (white). Right: Mean  $\pm$  SEM of *NEUROD1*<sup>+</sup>  
1028 cell types: N = 2, 11 pcw human fetal lungs, n = 129; N = 3, 12 pcw human fetal lungs, n = 132.  
1029 Scale bars 25  $\mu$ m.  
1030 (F) Gene signature scoring of A-type and N-type SCLC features in the epithelial UMAP.  
1031 (G) Scenic analysis of predicted TF network governing mid tip progenitor cells to pulmonary NE.  
1032 Trajectory and colour coding match Fig. S13A,B.  
1033 (H) Organoids from 8 pcw human fetal lungs were transduced with Doxycycline (Dox) inducible TF,  
1034 or mNeonGreen-NLS, lentivirus. Transduced organoids were isolated by flow cytometry based on  
1035 TagRFP expression, seeded in Matrigel for 10-13 days prior to Dox treatment. Organoid cells were  
1036 harvested 3 days post-Dox for scRNA-Seq. N=3 organoid lines.  
1037 (I) Left: reference UMAP of primary human fetal lung epithelium. Mid and right: scRNA-Seq of  
1038 organoids overexpressing *mNeonGreen-NLS*, *ASCL1* or *NEUROD1* projected onto the primary  
1039 data.  
1040 See also Figures S13 and S14.

1041 **Figure S1. Quality control for scRNA-seq and scATAC-seq data**

1042 (A) Distributions of the number of genes detected per cell, grouped by 10X libraries.  
1043 (B) Proportions of broad cell types in samples treated with Trypsin, and Trypsin plus EPCAM  
1044 enrichment following colour codes in Figure 1C.



1045 (C) Initial clusters of data separating compartments, before subclustering.  
1046 (D-F) Workflows of the recursive subclustering method (D), the Doublet Cluster Labeling  
1047 (DouCLing) method to identify doublet-driven clusters (E), and inference of maternal cells using  
1048 Souporecell (F).  
1049 (G) Doublet scores calculated by Scrublet.  
1050 (H) Inferred doublet clusters using DouCLing.  
1051 (I) Number of genes detected projected on UMAP.  
1052 (J) Percentage of mitochondrial reads.  
1053 (K) Cells in curated doublet clusters.  
1054 (L) Cells in clusters of cells coming from other organs. Marker genes in parentheses.  
1055 (M) Inferred maternal cells.  
1056 (N) Cells in curated low-quality cell clusters.  
1057 (O,P) scATAC-seq quality metrics of fragment detection per cell (O) and reads mapped in  
1058 transcription-start sites (P).  
1059

1060 **Figure S2. Overview of 144 cell types or cell states**

1061 (A-E) All of the curated 144 clusters of single cells projected on UMAP space of transcriptomes,  
1062 colored by cell type/state (A), developmental stage (B), inferred cell-cycle phase (C), dissection  
1063 region (D) and dissociation/enrichment strategy (E).  
1064 (F) Cells from the initial PNS cluster (C7) projected on UMAP space of transcriptomes, colored  
1065 by cell type/state.  
1066 (G) Selected feature genes of cell types/states in the initial PNS cluster.  
1067 (H) Spatiotemporal biases of cell types. Cell types are shown as dots with x representing the  
1068 weighted average of developmental stages, y representing the score of proximal enrichment and  
1069 the size corresponding to the cluster size.  
1070

1071 **Figure S3. Comparing fetal lung scRNA-seq with adult human and mouse lung scRNA-seq.**

1072 (A-F) Correlations of scVI latent variables between human fetal lung cell clusters and those of  
1073 previously annotated adult cell clusters (Madisson et al. 2021, A-C) and mouse lung cell clusters

1074 (Zepp et al. 2021, D-F), focusing on epithelial (A, D), fibroblast (B, E) and endothelial (C, F)  
1075 compartments.

1076 (G) Expression dotplot of genes shared or unique to fetal/adult lung AT1/AT2 cell clusters..

1077

1078 **Figure S4. Spatial analysis of airway epithelial cells in the developing human lungs by *in situ***  
1079 **HCR.**

1080 (A) Tip and stalk epithelial cells in distal regions of fetal lungs at 17 pcw, immunostained using  
1081 antibodies against CD36 (tip epithelial cells, red), PDPN (stalk epithelial cells, white), and E-  
1082 cadherin (epithelium, cyan).

1083 (B, B') Airway progenitor cells in distal fetal lungs at 10 (B) and 16 (B') pcw. The airway  
1084 progenitor cells marked by  $SOX9/CYTL1^+/SCGB3A2^+$  are located proximally to the  $CYTL1^-$   
1085  $/SCGB3A2^-$  stalk.  $SCGB1A1$  indicates club cells (B, white).  $SFTPC$  is mainly expressed in the tip  
1086 and partly located in stalk regions (B', green).

1087 (C)  $GHRL^+$  neuroendocrine (dashed line, red) and  $GRP^+$  pulmonary neuroendocrine cells (arrow,  
1088 green) in fetal lungs at 22 pcw.  $SFTPC$  indicates tip epithelial cells (white).

1089 (D) Airway progenitor (arrowhead) and club cells (arrow) in non-cartilaginous airway regions of  
1090 fetal lungs at 12 pcw are marked by  $SCGB3A2^+/SCGB1A1^-$  and  $SCGB3A2^+/SCGB1A1^+$ ,  
1091 respectively. Tip, stalk, airway progenitor, and club cells are localised progressively more  
1092 proximally from the distal tip regions to the proximal non-cartilaginous airway regions.  $SCGB3A2$   
1093 (green),  $SCGB1A1$  (red).

1094 (E) Proximal secretory 1 (arrowhead) and 2 (arrow) are distinguishable by the presence or absence  
1095 of  $SCGB1A1$  expression, each marked by  $SCGB3A1^+/SCGB1A1^{low/-}/MUC16^{low/-}$  and  
1096  $SCGB3A1^+/SCGB1A1^+/MUC16^{low/+}$ , respectively, in the proximal cartilaginous airway in 15 pcw  
1097 fetal lungs.  $MUC16^+$  only cells are  $MUC16^+$  ciliated cells.  $SCGB3A2$  (green),  $SCGB1A1$  (red),  
1098  $MUC16$  (white).

1099 (F) Proximal secretory 2 (arrowhead) and 3 (arrow) are distinguishable by the presence or absence  
1100 of  $SCGB3A2$  and  $MUC16$  expression, marked by  $SCGB3A2^+/SCGB1A1^+/MUC16^{low/+}$  and  
1101  $SCGB3A2^{low/-}/SCGB1A1^+/MUC16^+$ , respectively, in the proximal cartilaginous airway of fetal  
1102 lungs at 15 pcw.  $SCGB3A2$  (green),  $SCGB1A1$  (red),  $MUC16$  (white).

1103 (G) Submucosal gland cells (arrow) located in SMGs are marked by strong *LTF* expression with  
1104 *SCGB3A1*<sup>+</sup>/*SCGB3A2*<sup>-</sup> in the proximal cartilaginous airway regions of fetal lungs at 15 pcw.  
1105 *SCGB3A2* (green), *LTF* (red), *SCGB3A1* (white).

1106 (H) Ciliated cells and secretory cells are distinguishable by expression of *FOXJ1* (red) or  
1107 *SCGB3A2* (green) in the non-cartilaginous airway regions at 19 pcw lungs. Ciliated cells  
1108 (arrowhead), *FOXJ1*<sup>+</sup>/*SCGB3A2*<sup>-</sup>; secretory cells (arrow), *FOXJ1*<sup>-</sup>/*SCGB3A2*<sup>+</sup>.

1109 (I) *MUC16*<sup>+</sup> ciliated cells (dashed line), ciliated cells (dashed circle), and secretory cells (arrow)  
1110 located in the proximal cartilaginous airway regions of fetal lungs at 19 pcw. The *MUC16*<sup>+</sup> ciliated  
1111 cells express *MUC16* (white) with a weak level of *FOXJ1* (red), whereas the ciliated cells only  
1112 express strong *FOXJ1* without *MUC16* expression. *SCGB3A2* (green)

1113 (J, J') Proximal basal cells (J, dashed line) line the basal layer of the proximal cartilaginous  
1114 pseudostratified airway in fetal lungs at 19 pcw and are marked by *TP63* (red), *F3* (white), and  
1115 *IGFBP3* (green). In contrast, only a few *TP63*<sup>+</sup> basal cells (J', red, arrowheads) are observed in  
1116 the non-cartilaginous, non-pseudostratified airway regions.

1117 (K) *ASCL1*<sup>+</sup> pulmonary neuroendocrine (arrow) and *MUC5AC*<sup>+</sup>/*ASCL1*<sup>+</sup> progenitors (arrowhead)  
1118 in the non-cartilaginous airway regions of fetal lung at 12 pcw. *MUC5AC* (green), *ASCL1* (red),  
1119 *SCGB3A2* (white).

1120 DAPI, nuclei. Scale bars, 50  $\mu$ m.

1121 (L) Diagram describing spatial location of epithelial cell types observed in the developing human  
1122 lungs.

1123

1124 **Figure S5. Spatiotemporal location, distribution, and quantification of major epithelial cell**  
1125 **types along the distal to proximal axis of the developing lungs.**

1126 (A) *In situ* HCR analysis of fetal human lung tissues at mid (10-12 pcw) and late (15-21 pcw)  
1127 stages, showing spatiotemporal location and distribution of major epithelial cell types along the  
1128 distal to proximal axis of the developing lungs. The lung regions were divided for imaging into  
1129 tip, stalk to terminal airway; distal to proximal non-cartilaginous airway; and proximal  
1130 cartilaginous airway.

1131 (B) Quantification of cells expressing marker genes of airway lineages along the airway regions at  
1132 mid (10-12 pcw, upper) and late (15-21 pcw, lower) stages. *SCGB3A2*, airway progenitors/all

1133 secretory lineage cells; *CYTL1*, airway progenitor cells; *NDUFA4L2*, club/proximal secretory  
1134 cells; *FMO2*, club/proximal secretory cells; *FOXJ1*, ciliated cells; *TP63*, basal cells; *SCGB1A1*,  
1135 club/proximal secretory cells; *SCGB3A1*, proximal secretory cell subtypes 1-3. Significance was  
1136 evaluated by 1-way ANOVA with Tukey multiple comparison post-test; n=3 biological replicates;  
1137 ns: not significant \* $P<0.05$ , \*\* $P<0.01$ , \*\*\* $P<0.001$ , \*\*\*\* $P<0.0001$ .

1138 (C) Proportion of proximal secretory progenitor cells, proximal secretory cell subtypes 1-3 within  
1139 the proximal cartilaginous airway regions by ages, at 10-12, 15-16, and 19-21 pcw. The secretory  
1140 cells in the proximal cartilaginous airway regions were counted: Prox Secretory Prog,  
1141  $SCGB3A2^+SCGB3A1^-SCGB1A1^-$ ; Prox Secretory 1,  $SCGB3A2^+SCGB3A1^+SCGB1A1^-$ ; Prox  
1142 Secretory 2,  $SCGB3A2^+SCGB3A1^+SCGB1A1^+$ ; Prox Secretory 3,  $SCGB3A2^-$   
1143  $SCGB3A1^+SCGB1A1^+$ . Club cells located in the non-cartilaginous airway regions were excluded.  
1144 Significance was evaluated by 2-way ANOVA with Tukey multiple comparison post-test; n=4  
1145 biological replicates; ns: not significant \* $P<0.05$ , \*\* $P<0.01$ , \*\*\* $P<0.001$ .

1146 (D) Diagram describing spatiotemporal distribution of major cell type markers along the distal to  
1147 proximal axis of the developing lungs, at mid and late stages. Mid stage only, blue; Late stage  
1148 only, red; Mid-to-late stages, green. Arrows indicate narrowed (*CYTL1*) or expanded (*NDUFA4L2*,  
1149 *FOXJ1*) distribution after mid to late stage transition.

1150 (E) *In situ* HCR analysis of rare cell type markers of putative ionocytes (*FOXJ1* yellow) and tuft  
1151 cells (*POU2F3*, red). *E-cadherin*, green.

1152 DAPI, nuclei. Scale bar, 50  $\mu\text{m}$ .

1153 **Figure S6. Trajectory analysis of airway lineage differentiation via airway progenitor cells**  
1154 **in the developing human lung.**

1155 (A, A') UMAP visualization (A) and PAGA analysis (A') of a lineage trajectory from mid tip to  
1156 proximal secretory lineage cells, including proximal secretory progenitor and proximal secretory  
1157 cell subtypes 1 to 3. Mid and late basal cells were shown to be disconnected from other proximal  
1158 secretory cell types in the PAGA analysis (A').

1159 (B-C) Trajectory UMAPs, by cell type (B) and stages (B'), and the relevant gene expression  
1160 heatmap (C) displaying the selected lineage trajectory from mid tip to proximal secretory cell  
1161 subtypes 1 and 2, analysed by Monocle 3. (Note that the grey lines in UMAP indicate all of the  
1162 predicted differentiation paths from a user-defined starting point.)

1163 (D, D') UMAP visualization (D) and PAGA analysis (D') of a lineage trajectory from late tip, late  
1164 stalk, late airway progenitor to club cells. Basal cells, including late basal, proximal basal, and  
1165 SMG basal cells were shown to be left out of the trajectory as they do not connect clearly to the  
1166 other cell types in this analysis (D').

1167 (E-F) Trajectory UMAPs, by cell types (E) and stages (E'), and the relevant gene expression  
1168 heatmap (C) showing the selected lineage trajectory from late tip to club cells, analysed by  
1169 Monocle 3.

1170 (G) Purification of distal *SCGB3A2*-GFP<sup>+</sup> airway cells from human fetal lung tissues at 8-11 pcw.  
1171 The epithelial cells were isolated using EPCAM magnetic microbeads (MACS) from the dissected  
1172 distal and proximal airway tissues, followed by infection with lentivirus harbouring *SCGB3A2*  
1173 promoter-driven GFP. The *SCGB3A2*-GFP positive cell fractions were sorted and analysed by  
1174 FACS after 48 hrs and *in vitro* cultured for 28 and 45 days in the airway differentiation medium.

1175 (H) Gene expression profile of the freshly purified *SCGB3A2*-GFP positive cells derived from  
1176 distal and proximal airway tissues were investigated by qRT-PCR and compared with dissected  
1177 tip cells. *SOX9*, distal tip progenitor marker. *CYTL1*, airway progenitor marker. *SCGB1A1* and  
1178 *SCGB3A2*, airway/secretory cell lineage markers. *SCGB3A1*, proximal secretory cell marker. Data  
1179 was normalised to *SCGB3A2*-GFP negative cells derived from distal tip/stalk tissues; mean  $\pm$  SD  
1180 of 3 biological replicates. Significance was evaluated by 1-way ANOVA with Tukey multiple  
1181 comparison post-test; \* $P < 0.05$ , \*\* $P < 0.01$ , \*\*\* $P < 0.001$ .

1182 (I) Gene expression analysis of the *in vitro* cultured *SCGB3A2*-GFP positive cells (airway  
1183 progenitors) derived from distal airway tissues by qRT-PCR. Airway organoids were formed from  
1184 the *SCGB3A2*-GFP positive cells and collected at Day 0, 14, and 28 days after culture for the  
1185 analysis. Data were normalised to *SCGB3A2*-GFP negative cells derived from distal tip/stalk  
1186 tissues; mean  $\pm$  SD of 4 biological replicates. Significance was evaluated by 1-way ANOVA with  
1187 Tukey multiple comparison post-test; ns: not significant \* $P < 0.05$ , \*\* $P < 0.01$ .

1188 (J-M) Immunofluorescence analysis of two biologically independent, *SCGB3A2*-GFP<sup>+</sup> cell-  
1189 derived airway organoids cultured in the airway differentiation medium for 28 (J-L) and 45 (M)  
1190 days. *SCGB1A1* (J, red), airway progenitor/secretory cell marker. TP63 (K, red), basal cell marker.  
1191 *FOXJ1* (L, magenta), ciliated cell marker. *SCGB3A1* (M, red), proximal secretory cell marker.  
1192 DAPI, nuclei. Scale bar, 50  $\mu$ m.

1193 **Figure S7. Late epithelial tip cells differentiate to AT2 and AT1 cells.**

1194 (A, B) UMAP visualisation (A) of a lineage trajectory from early/mid/late tip to fetal AT2 and  
1195 AT1 cells and the relevant gene expression heatmap (B) showing the selected lineage trajectory  
1196 analysed by Monocle 3.

1197 (C) *In situ* HCR (*TPPP3* and *SFTPC*) and immunostaining (SOX9) analysis of 15 pcw fetal lung,  
1198 describing SOX9<sup>+</sup>*TPPP3*<sup>+</sup>*SFTPC*<sup>+</sup> tip epithelial progenitors (lines) and SOX9<sup>-</sup>*TPPP3*<sup>-</sup>*SFTPC*<sup>+</sup>  
1199 fetal AT2 cell population (dashed circles) lining the stalk.

1200 (D) Immunostaining of 21 pcw fetal lung using antibodies against SOX9 (red), PDPN (white), and  
1201 E-cadherin (green). Arrows indicate the late tip cell population, which does not co-express the  
1202 stalk marker, PDPN.

1203 (E-G) *In situ* HCR analysis of 19 (F) and 21 pcw (E, G) fetal lungs, showing the *SFTPC*<sup>+</sup> fetal  
1204 AT2 cell population (arrowheads) lining the developing air sacs. Arrows indicate *SFTPC*<sup>+</sup> late tip  
1205 cells. (E) *SFTPC* (red). (F, G) *NAPSA* (white; F) and *ETV5* (red; G) overlap with *SFTPC* in the  
1206 fetal AT2 cells.

1207 (H-J) *In situ* HCR analysis of distal lung regions at 17 (H), 20 (I), and 21 (J) pcw, visualising  
1208 *SFTPC*<sup>-</sup> fetal AT1 cells (arrows). *SFTPC*<sup>-</sup>/*SPOCK2*<sup>-</sup> stalk cells at 17 pcw (H) began to express  
1209 *SPOCK2* (red) at 20 pcw (I) and further developed to future AT1 cells (*SFTPC*<sup>-</sup>/*SPOCK2*<sup>+</sup>) at 21  
1210 pcw (J). Dashed circles (I) and arrowheads (J) indicate fetal AT2 cells. Dashed line (J) shows fetal  
1211 AT1 cells lining the developing air sacs.

1212 DAPI, nuclei. Scale bars, 50  $\mu$ m.

1213 **Figure S8. Endothelial cell types in the developing human lung.**

1214 (A,B) UMAP visualisation of endothelial cells, coloured by cell types (A) and stages (B).

1215 (C) Dot plot describing differential marker gene expression level by cell type.

1216 (D-F) *In situ* HCR analysis of distal lung regions at 20 (E), and 21 (D, F) pcw. (D) Aerocytes  
1217 (*S100A3*<sup>+</sup> red/*CA4*<sup>+</sup> white), capillary endothelium (*CA4*<sup>+</sup> white), and all endothelial cells  
1218 (*PECAM*<sup>+</sup>, green). (E) Arterial endothelial cells (*GJA5*<sup>+</sup> red), venous endothelial cells (*ACKR3*<sup>+</sup>  
1219 white), and all endothelial cells (*PECAM*<sup>+</sup>, green). (F) Lymphatic endothelial cells (*PROX1*<sup>+</sup>  
1220 white) and all endothelial cells (*PECAM*<sup>+</sup>, green). DAPI, nuclei. Scale bars, 50  $\mu$ m.



1221 (G) Trajectory UMAP and PAGA plot (G'') visualising potential endothelial cell lineage hierarchy  
1222 from Mid/Late capillary endothelial cells to arterial endothelial cells, aeryocytes, or venous  
1223 endothelial cells coloured by cell types (G) and stages (G').

1224 (H, I) Individual trajectory UMAPs (H) and the relevant gene expression heatmaps (I) displaying  
1225 potential lineage trajectories derived by Monocle 3 from Mid/Late capillary endothelial cells to  
1226 arterial endothelial cells (*top*), aeryocytes (*middle*), or venous endothelial cells (*bottom*).

1227

1228 **Figure S9. Clustering and cell type markers for immune cell types and comparison to other**  
1229 **fetal data sets.**

1230 (A,C,G) UMAP embeddings of different immune compartments showing myeloid cell types/states  
1231 (A), T, NK and ILC lymphoid cells (C) and B lymphoid cells (G).

1232 (B,F,K) Dot plots showing expression of selected marker genes of cell types/states in the three  
1233 immune compartments.

1234 (D, E, H, I, J) Enrichment of each class of immune receptors based on abTCR, gdTCR and BCR-  
1235 enriched scRNA-seq.

1236 (L) Predicted organ-of-source with highest scores for cells shown in Figure 1, based on the  
1237 reference atlas in (Cao et al. 2020).

1238

1239 **Figure S10. Spatial analysis of mesenchymal cell types in the developing human lungs by *in***  
1240 ***situ* HCR assay and immunostaining.**

1241 (A) Vascular SMC 1 and 2 are surrounding arterial endothelial cells (*PECAMI*<sup>+</sup>, dashed line), each  
1242 marked by *NTN4*<sup>+</sup>/*PLN*<sup>-low</sup> (vSMC 1, arrows) and *NTN4*<sup>+</sup>/*PLN*<sup>+high</sup> (vSMC 2, lines).

1243 (B) Dot plot describing differential gene expression between vascular SMC 1 and 2.

1244 (C) Vascular SMCs and adventitial fibroblasts in 17 pcw fetal lung. *NDUF4AL2*<sup>+</sup> red/*NTRK3*<sup>+</sup>  
1245 vSMCs (arrows) are surrounded by *NDUF4AL2*<sup>-</sup>/*NTRK3*<sup>+</sup> adventitial fibroblasts (arrowheads).  
1246 *PECAMI* (green) indicates an endothelial cell tube.

1247 (D) *FAMI62B*<sup>+</sup> pericytes (red) are surrounding *PECAMI*<sup>+</sup> endothelial cells (green) in the  
1248 microvascular regions.

1249 (E) Dot plot describing differential marker gene expression level between alveolar, adventitial and  
1250 airway fibroblasts.

1251 (F) Concept network visualisation of gene ontology (GO) analysis using clusterProfiler for  
1252 differentially expressed genes in alveolar, adventitial and airway fibroblasts.

1253 (G-I) Immunostaining of fetal lung tissues at 11 (G), 15 (H), and 21 (I) pcw, to visualise  
1254 myofibroblast populations: Myofibroblast-1 (G) and -2 (H) surrounding the developing stalk  
1255 epithelial tubes, and Myofibroblast-3 (I) surrounding the developing air sacs. ACTA2<sup>+</sup>/PDGFRA<sup>+</sup>  
1256 Myofibroblast-1 (THBD<sup>weak</sup>; G) and -2 (THBD<sup>high</sup>, arrows; H). PDGFRA<sup>+</sup> Myofibroblast-3 at 21  
1257 pcw, does not express ACTA2 (arrows; I).

1258 (J) Dot plot describing differential gene expression level between myofibroblast-2 and -3. The  
1259 myofibroblast-2 population showed enriched expression of Wnt signalling associated genes, e.g.  
1260 *NOTUM*, *LEF1*, and *DACH2*.

1261 (K) *In situ* HCR assay of 17 pcw fetal lung tissues. Myofibroblast-2 expresses *NOTUM* (red), a  
1262 Wnt antagonist, to block local Wnt signals from alveolar fibroblasts (white, *WNT2*) to the stalk  
1263 epithelium.

1264 DAPI, nuclei. Scale bars, 50  $\mu$ m.

1265

### 1266 **Figure S11. Signalling ligand-receptor interactions in the adventitial niche.**

1267 (A) Overview of predicted ligand–receptor interactions using CellPhoneDB in the adventitial  
1268 niche. Dot plots visualise gene expression by cell type and dashed arrows indicate a predicted  
1269 direction of signalling from ligands to receptors.

1270 (B) Visium spot transcriptome cluster map visualising signalling ligands expressed in the fetal  
1271 lung tissues at 19 (upper) and 17 (lower) pcw. Scale bars denote 2.5 mm (upper) and 2 mm (lower),  
1272 respectively.

1273

### 1274 **Figure S12. Global landscape of motif enrichment.**

1275 Top 5 enriched motifs in the marker peaks among all the cell types/states. Statistical significance  
1276 is visualised as a heatmap according to the colour bar below.

1277

1278 **Figure S13. Transcription factor regulatory network controlling NE subtypes.**

1279 (A) Selected trajectory from Mid tip cells to *GHRL*<sup>+</sup> NE cells via Intermediate NEs, a transition  
1280 cell population.

1281 (B) Heatmap of genes differentially expressed along the trajectory.

1282 (C) Representative HCR images showing the transition between two types of NE cells. *GRP*  
1283 (green), *NEUROD1* (red), *GHRL* (white). #1 labelled *GRP*<sup>+</sup>*NEUROD1*<sup>low</sup>*GHRL*<sup>-</sup> cells, which have  
1284 just started the transition from *GRP*<sup>+</sup> pulmonary NE/precursor cells. #2 labelled  
1285 *GRP*<sup>low</sup>*NEUROD1*<sup>+</sup>*GHRL*<sup>low</sup> cells, in transition to *GHRL*<sup>+</sup> NE cells. #3 labelled *GRP*<sup>-</sup>  
1286 *NEUROD1*<sup>+</sup>*GHRL*<sup>+</sup>, *GHRL*<sup>+</sup> NE cells. Right: Mean ± SEM of *NEUROD1*<sup>+</sup> cell types. 11 pcw:  
1287 N=2 fetal lungs, n = 129 *NEUROD1*<sup>+</sup> cells; 12 pcw N=3 fetal lungs, n=132 *NEUROD1*<sup>+</sup> cells.  
1288 Scale bars = 25 μm in all panels.

1289 (D) Representative HCR images showing *NEUROG3* co-expression with *ASCL1* and *NEUROD1*.  
1290 Dashed white lines label representative cells showing different combinations of the three  
1291 transcription factors, further indicated by #1-#5 labelling. *ASCL1* (cyan), *NEUROG3* (red),  
1292 *NEUROD1* (yellow).

1293 (E) Representative HCR images showing *RFX6* expression in *GHRL*<sup>+</sup> NE cells. Dash yellow line  
1294 labelled *GRP*<sup>+</sup>*RFX6*<sup>-</sup> pulmonary NE cells. Scale bars = 25 μm in all panels.

1295

1296 **Figure S14. Validation of NE transcription factors using human fetal lung organoid system.**

1297 (A) Representative epifluorescent microscopic images showing organoid morphology after 3 days  
1298 of mNeonGreen-3xNLS (control), *ASCL1*, or *NEUROD1* overexpression.

1299 (B) ScRNA-seq results of organoid transcription factor overexpression overlay on human fetal  
1300 lung scRNA-seq as a reference.

1301 (C) scRNA-seq results of transcription factor overexpression; organoid data only in the UMAP.  
1302 Selected transcription factor expression was shown in the middle panel. A regulatory network of  
1303 the selected transcription factors were drawn based on the organoid OE data at the bottom of the  
1304 panel. (Note that the arrows do not necessarily denote direct interactions).

Figure 1

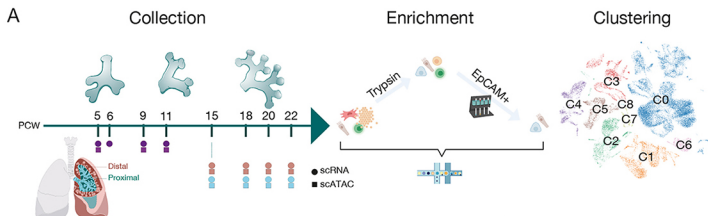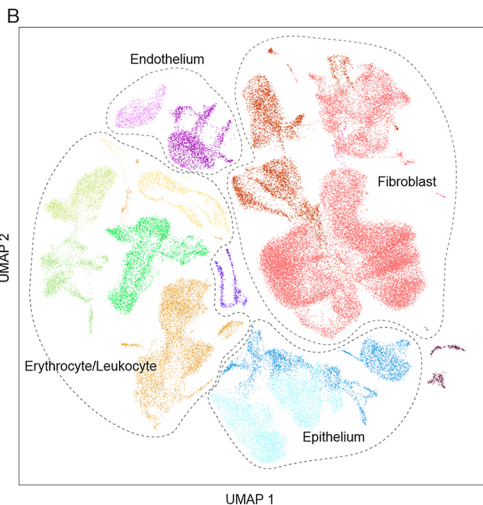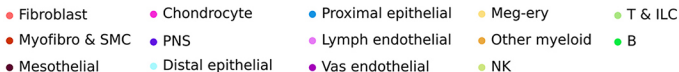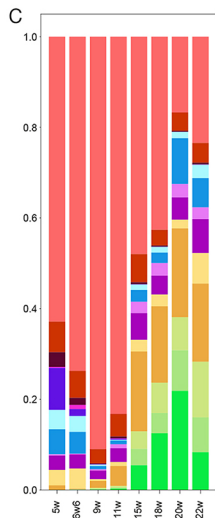

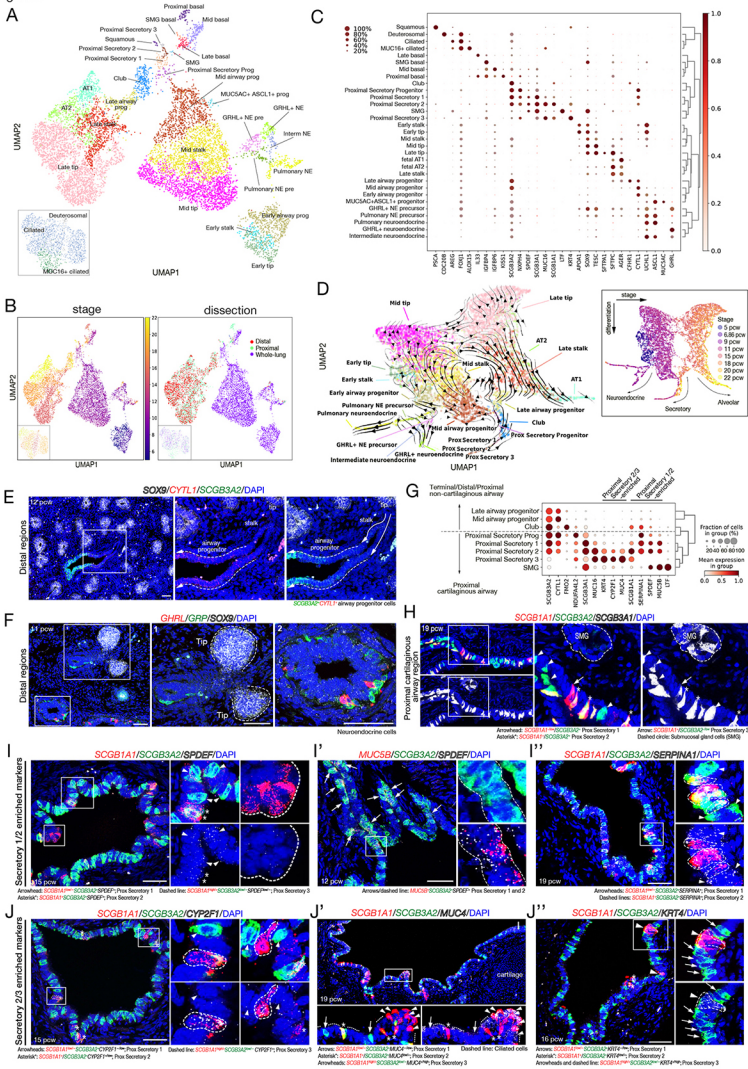







Figure 4

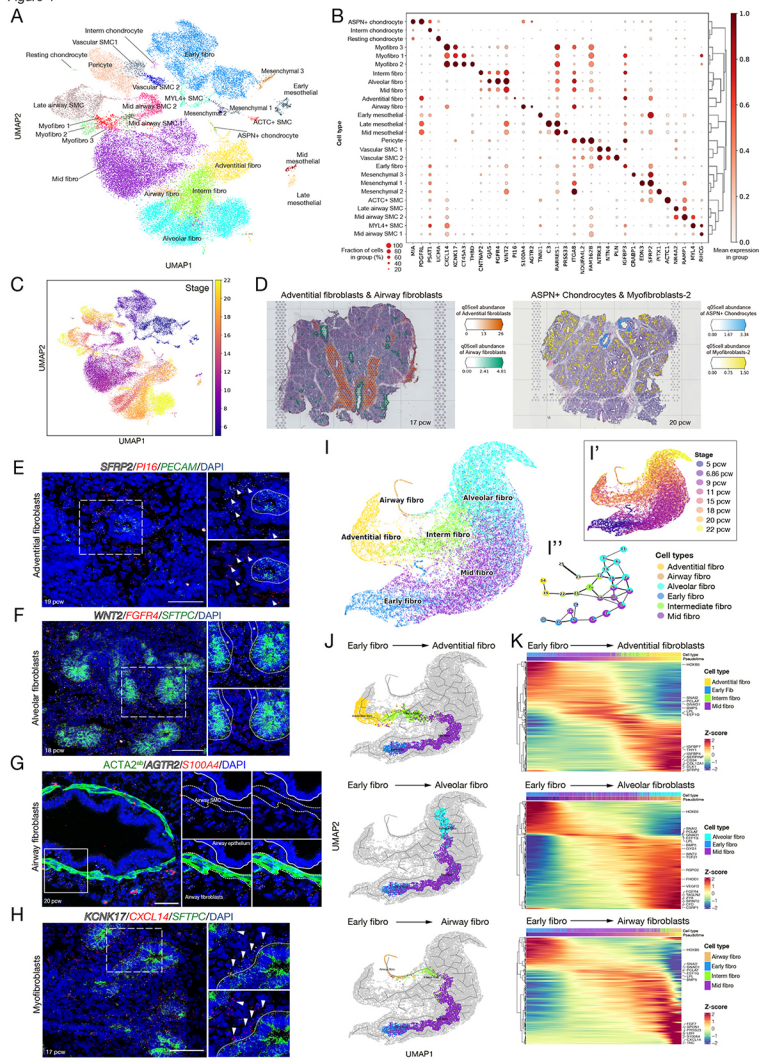

Figure 5

## A Airway region

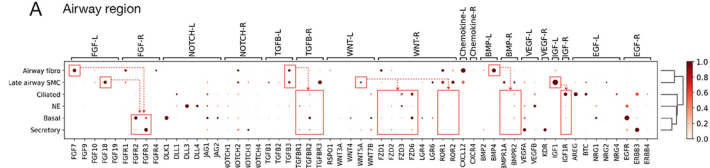

## B Alveolar region

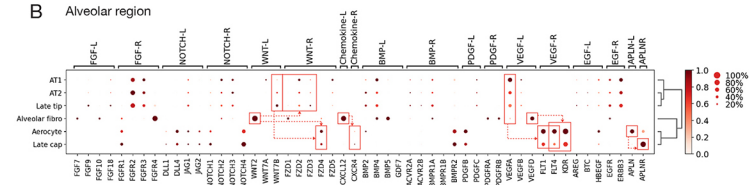

## C S100A4/CD44/ACTA2/DAPI

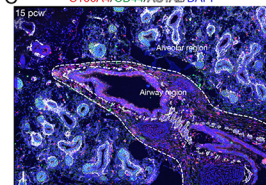

## D ACTA2/S100A4/RGF7/DAPI

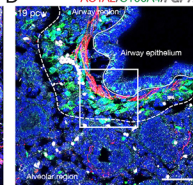

## E S100A4/WNT2/PECAM/DAPI

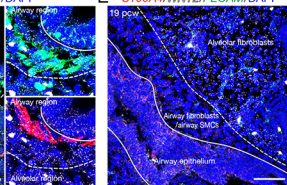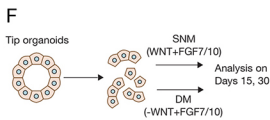

## G

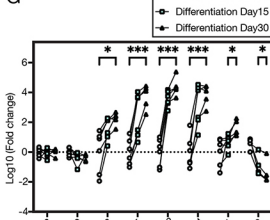

## H

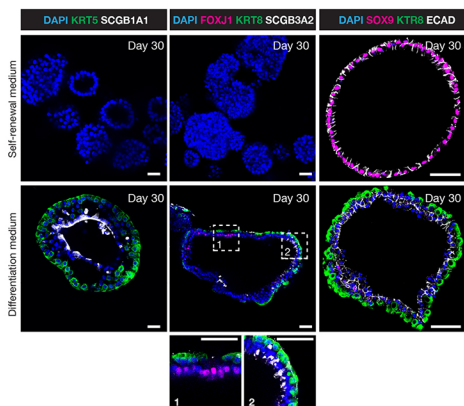

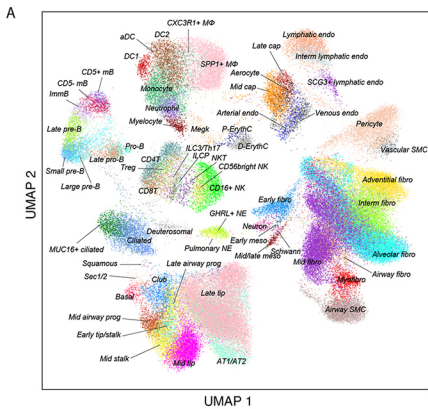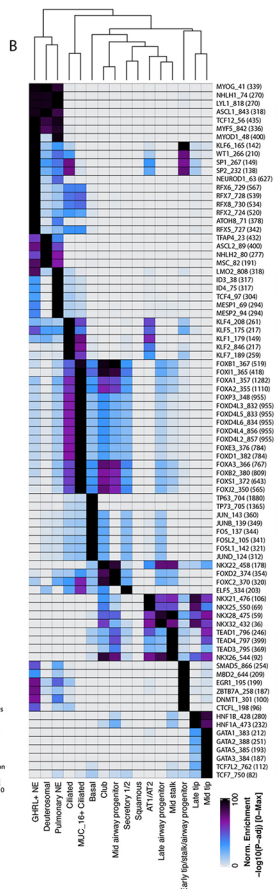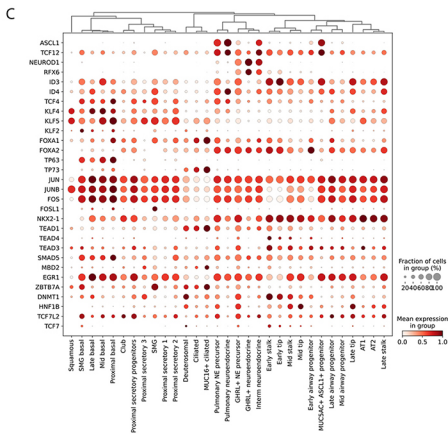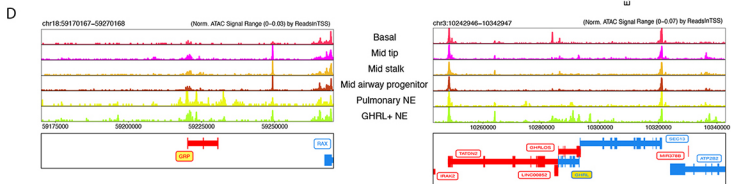

Figure 7

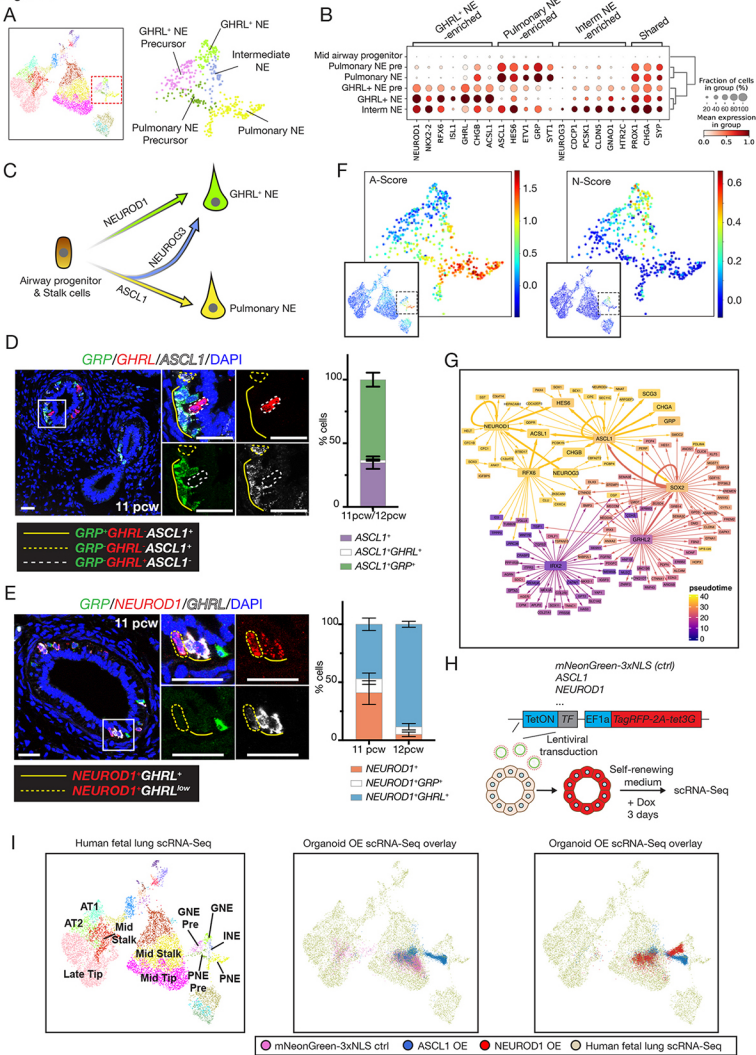

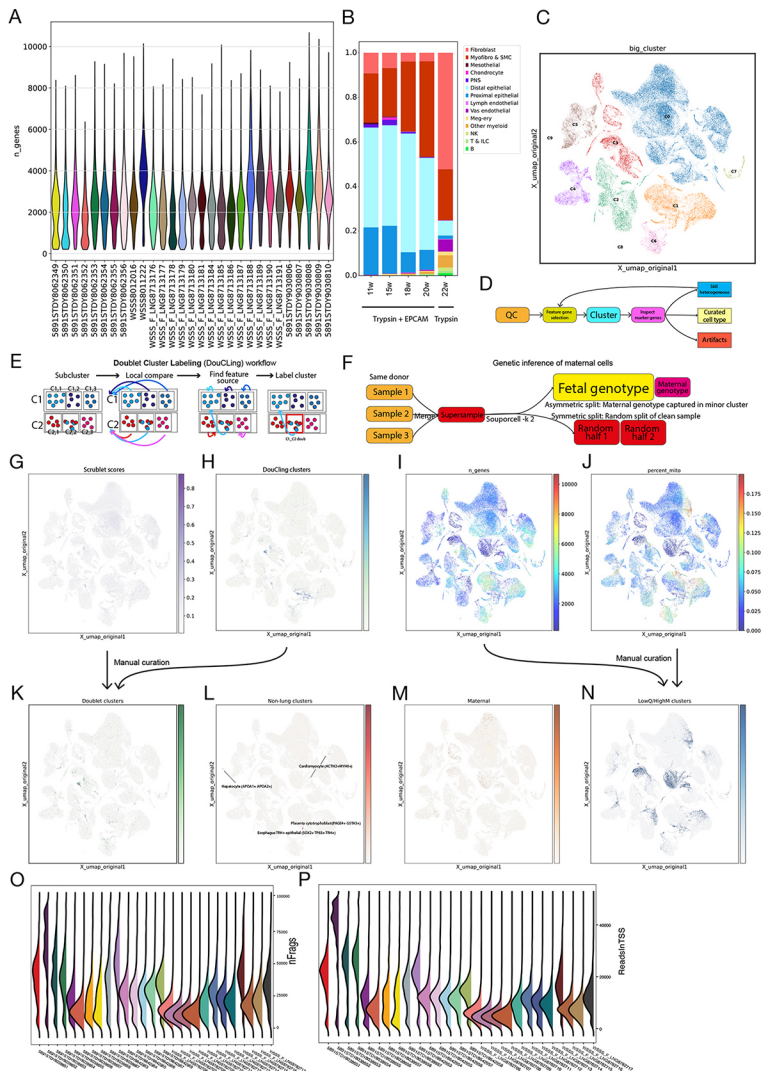



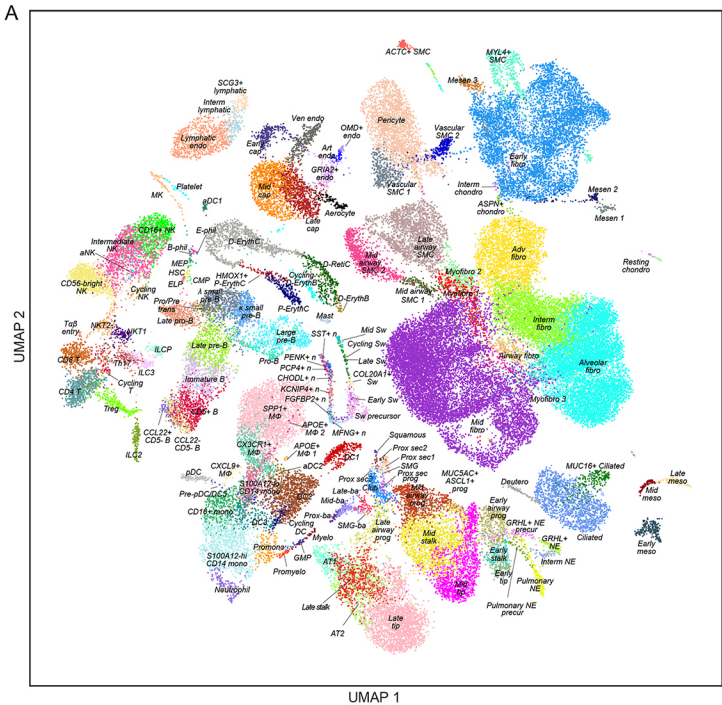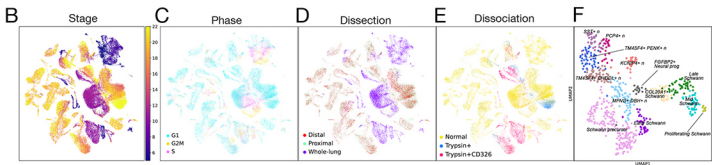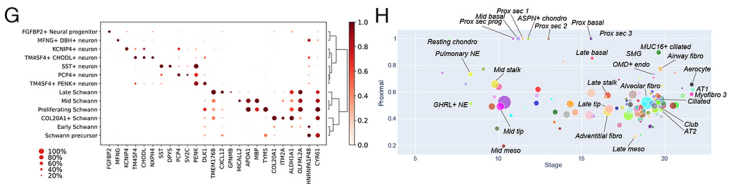



# Human adult lungs

# Mouse lungs

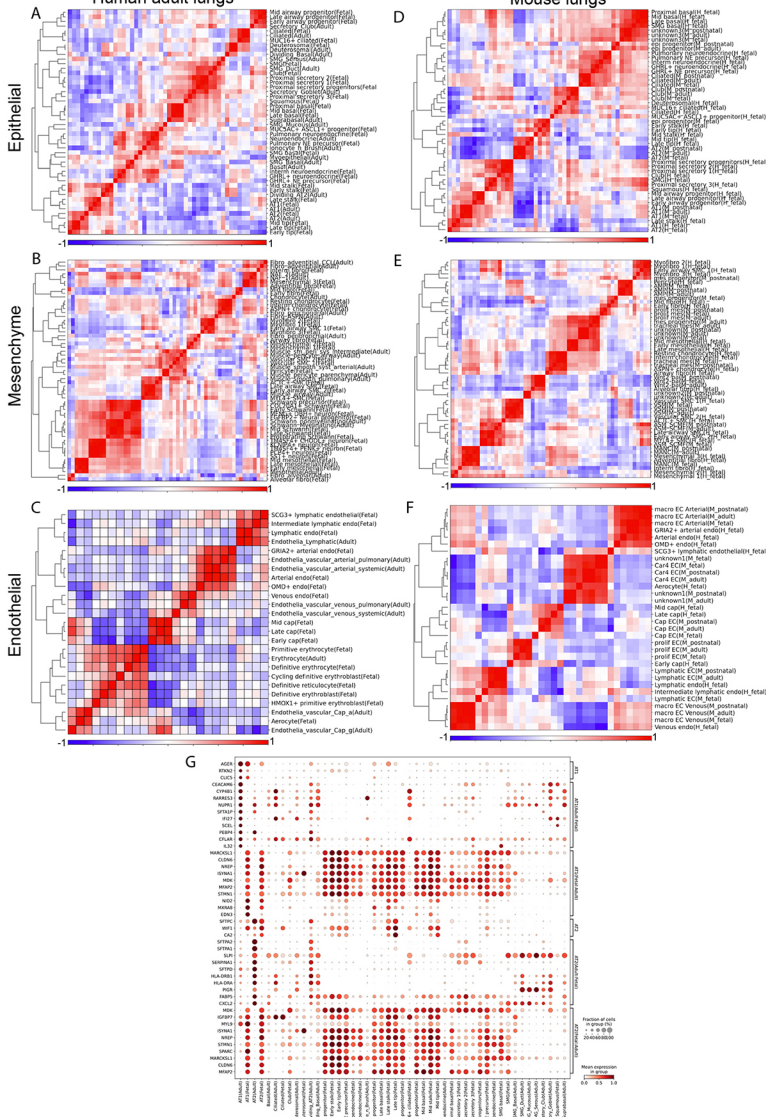

Figure S4

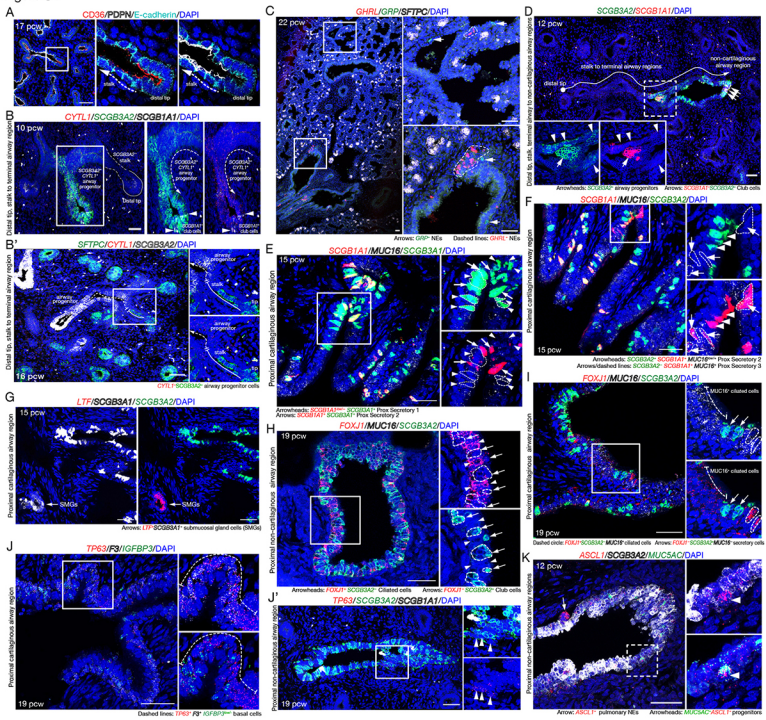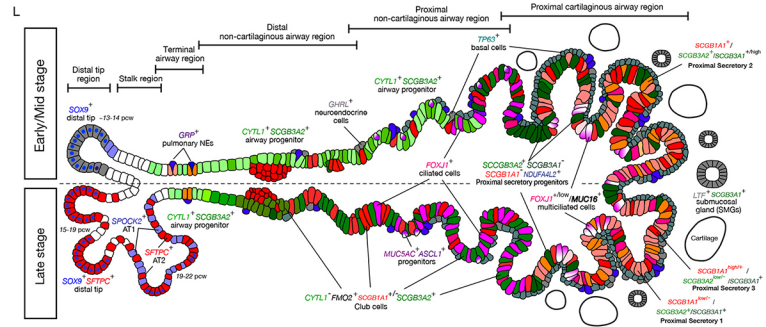

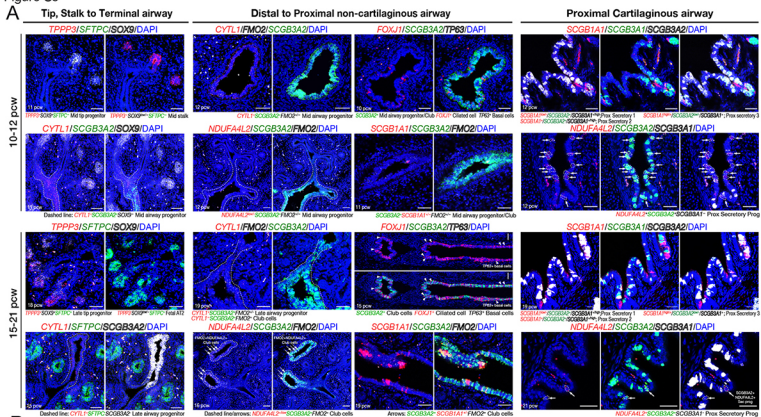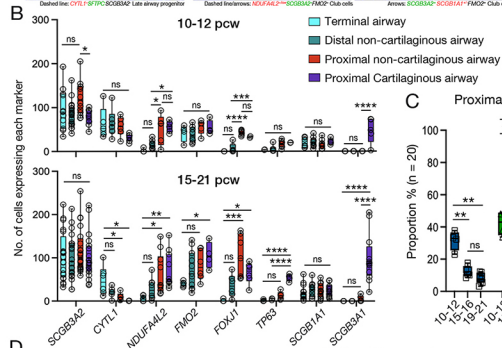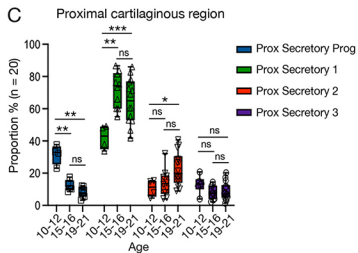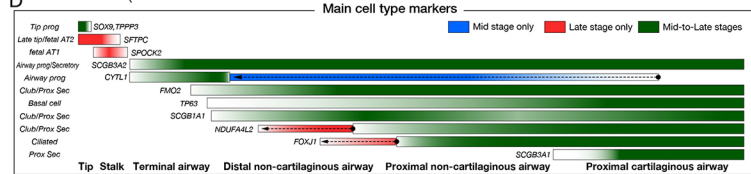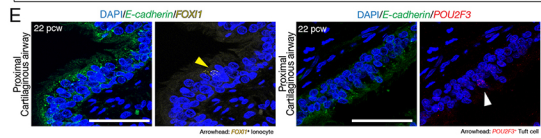

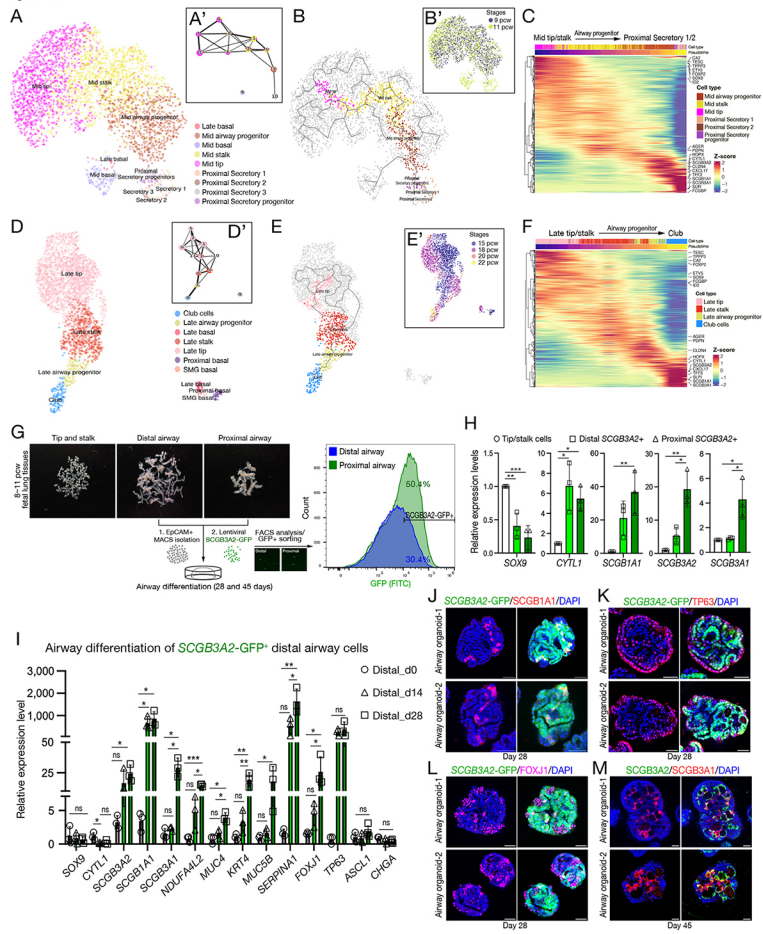



Figure S7

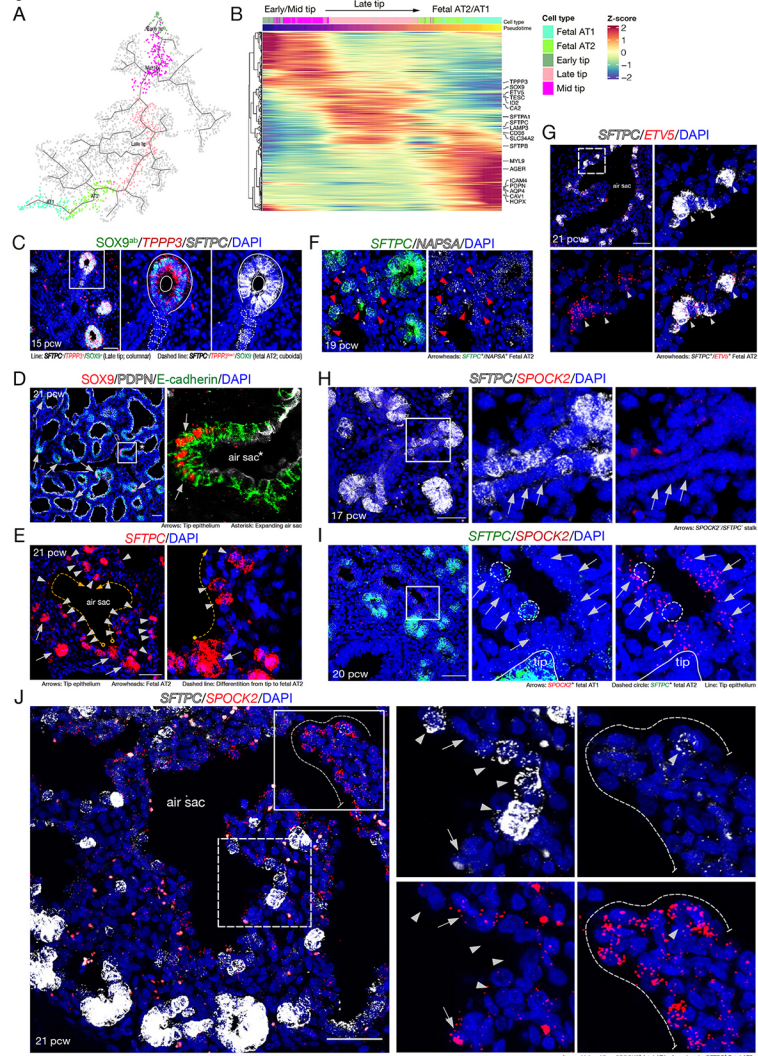







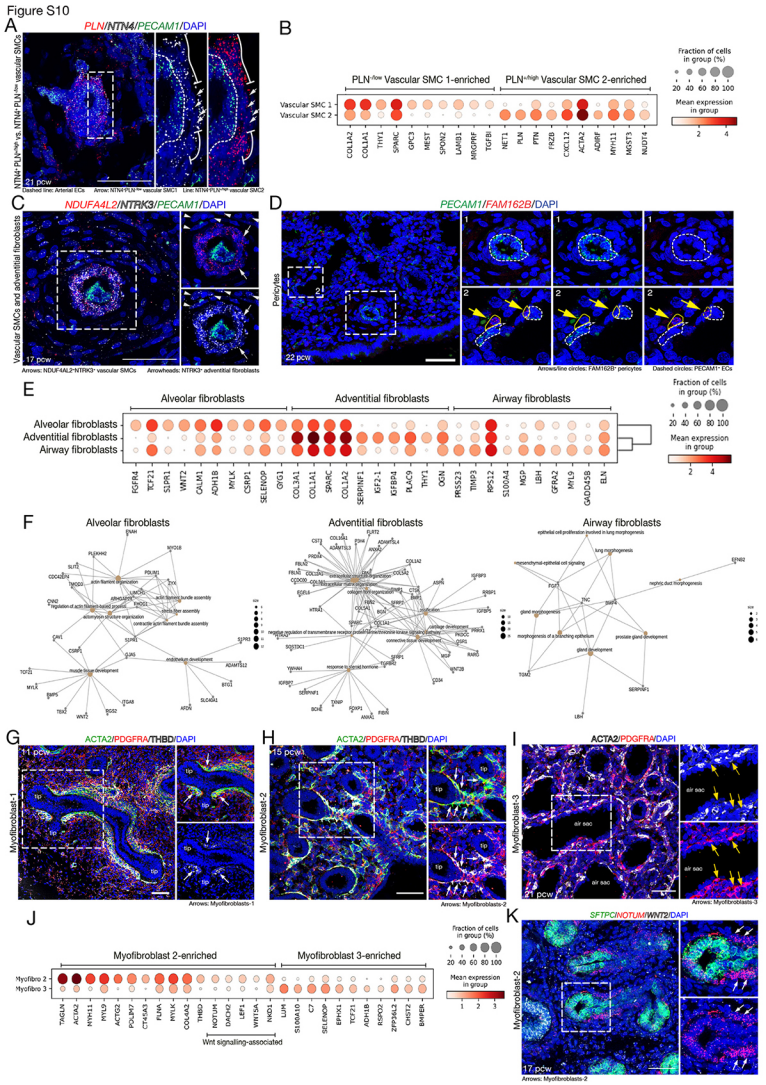

Figure S11

## A Adventitial region

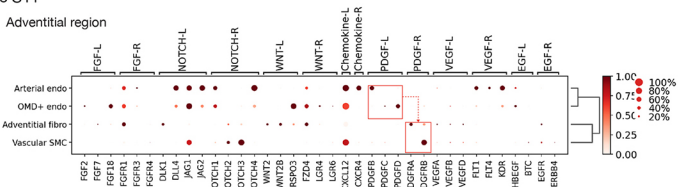

## B

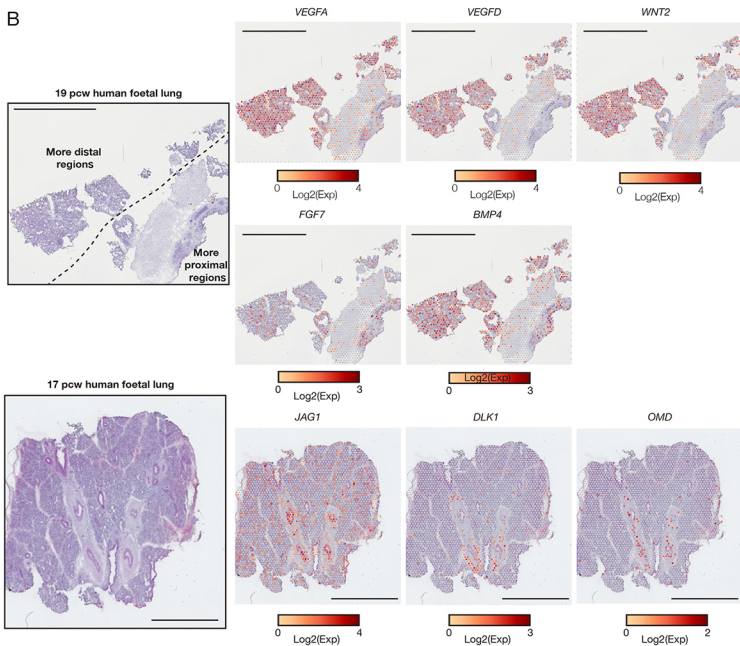

Figure S12

A

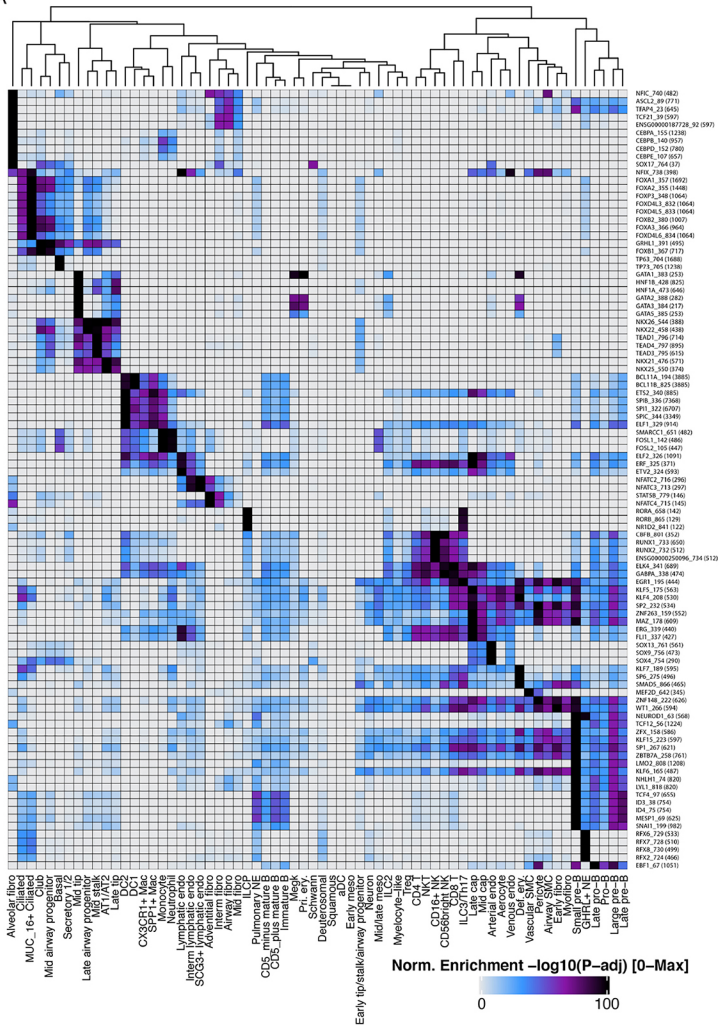

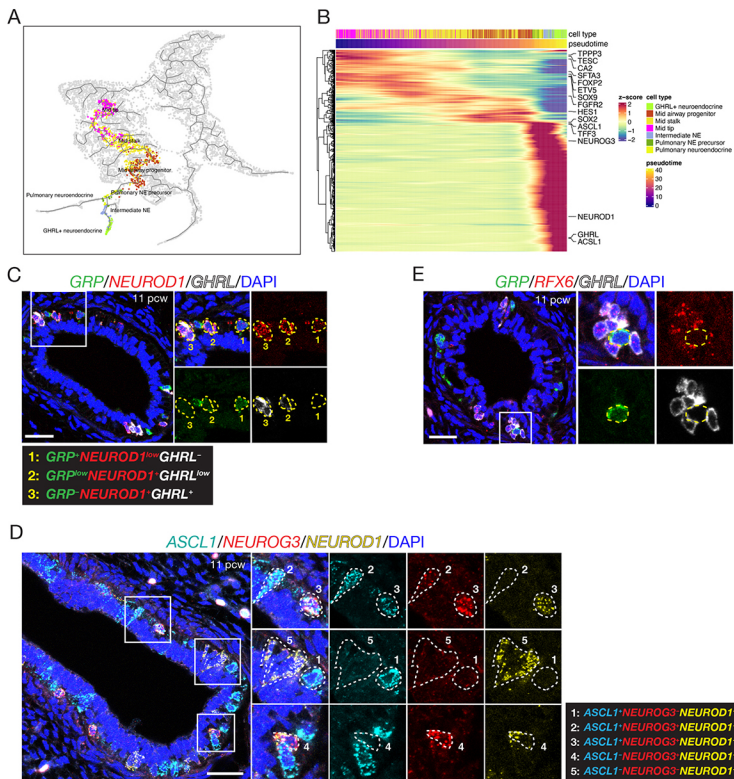



A

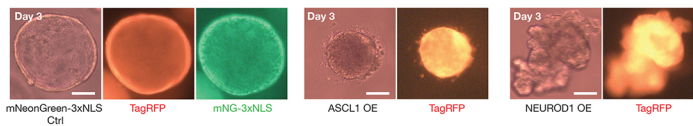

B

Organoid OE overlay on in vivo scRNA-Seq

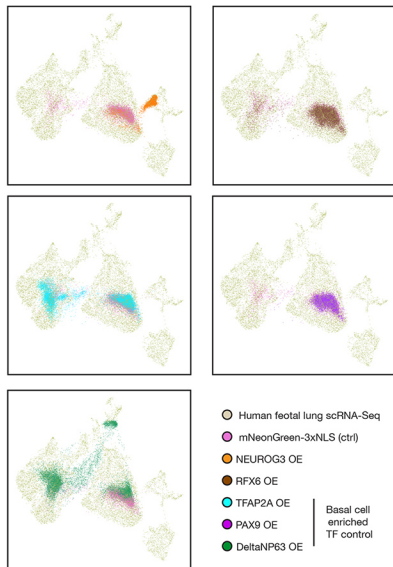

C

Organoid OE scRNA-Seq alone

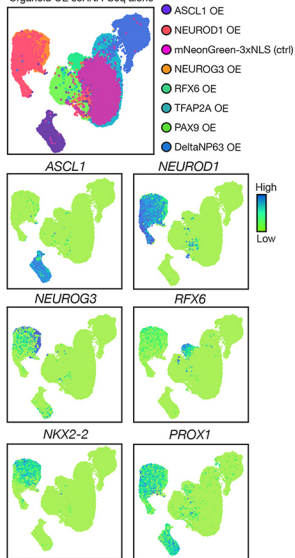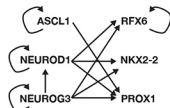

Source: http://biorxiv.org/content/10.1101/2022.01.11.474933v2.full.pdf
